# Supplementary material for: Influence of the fluoride anion on photoinduced charge transfer interactions in adenine-functionalized push–pull naphthalenediimide chromophores
Source: Royal Society of Chemistry journal article supplement (doi:10.1039/d2ma00030j), 2022-01-01
Supplement: d2ma00030j1.pdf [file d2ma00030j1.pdf]

## Supplementary Information

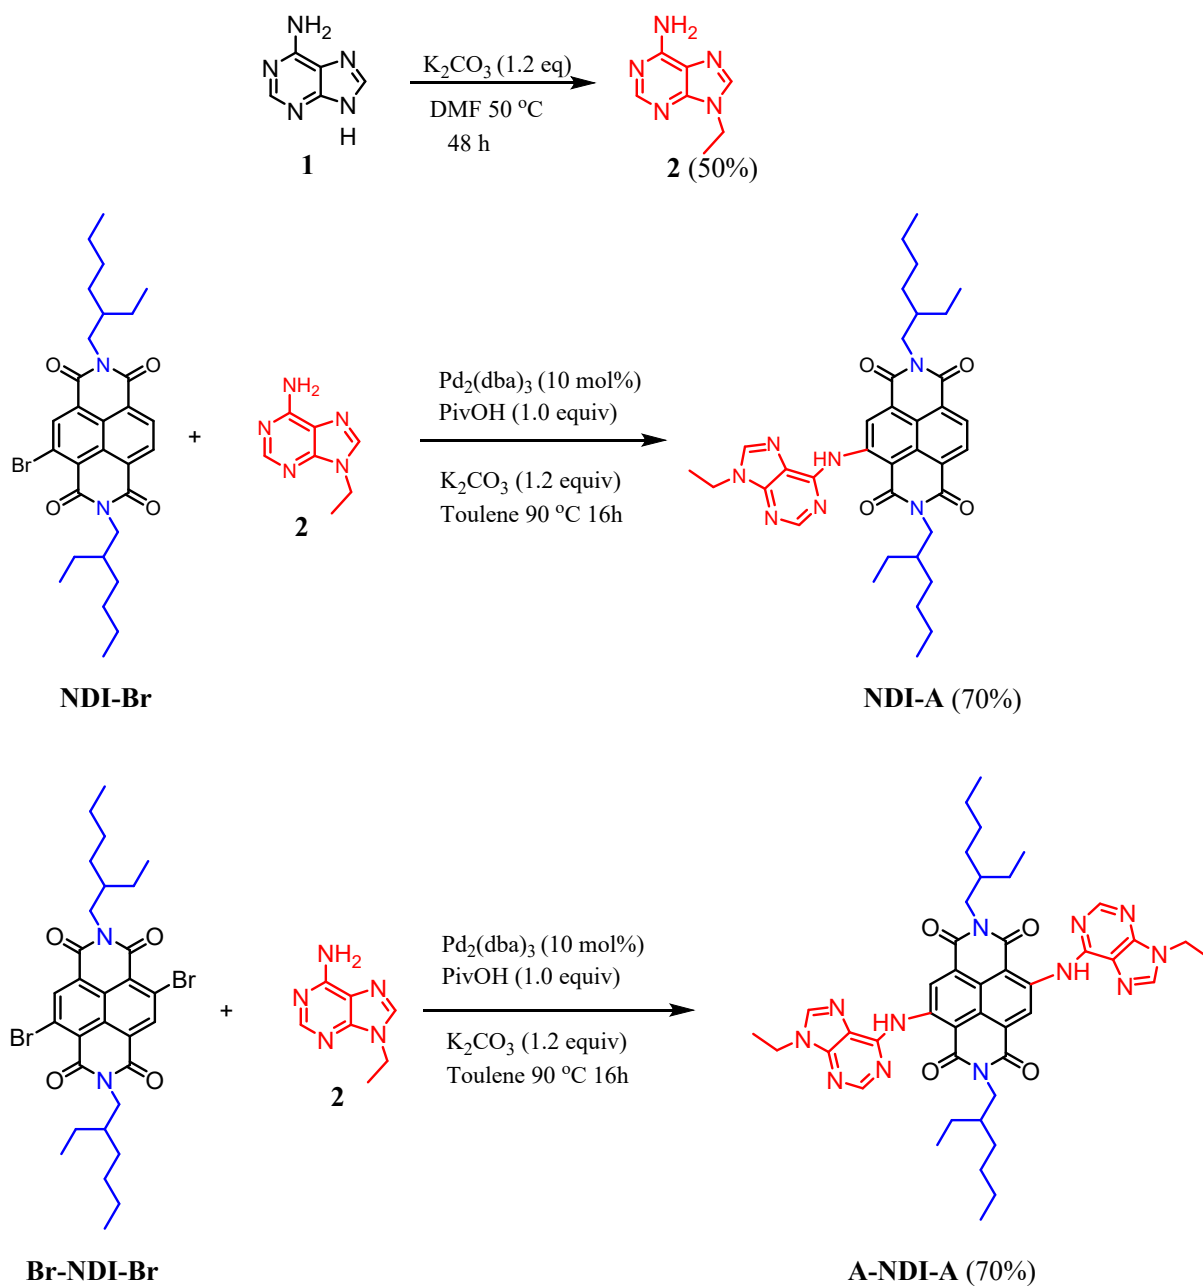

**Scheme S1.** Synthesis of **NDI-A** and **A-NDI-A**.

### Synthesis of NDI-A<sup>1</sup>

A clean dried 50 mL reaction RB charged with *mono*-bromo naphthalene diimide derivative (NDI-Br)<sup>2</sup> (150 mg, 0.263 mmol), alkylated adenine (1) (66.59 mg, 0.395 mmol) and K<sub>2</sub>CO<sub>3</sub>(weak base) (164 mg, 1.187 mmol) in dry toluene (10 mL). Then Pd<sub>2</sub>(dba)<sub>3</sub> (10 mmol %) catalyst and pivallic acid (121.33 mg, 1.187 mmol) were added to the mixture at r.t. under N<sub>2</sub> atmosphere. The reaction was stirred at 90 °C for 16 h. The color of reaction mixture was changed from yellow to dark orange. After consumption of starting material cool reaction mixture at rt. evaporated the solvent on rota evaporation and purified the orange color compound on column chromatography over silica gel in DCM system and washed with pentane to yield (70%) dark orange solid **NDI-A**. <sup>1</sup>H NMR (400 MHz, CDCl<sub>3</sub>) δ 13.44 (s, 1H), 10.79 (s, 1H), 8.81 (s, 1H), 8.73 (d, J = 7.7 Hz, 1H), 8.55 (d, J = 7.7 Hz, 1H), 8.08 (s, 1H), 4.43 – 4.09 (m, 6H), 2.10 – 1.91 (m, 2H), 1.66 – 1.60 (m, 6H), 1.47 – 1.24 (m, 16H), 0.98 – 0.84 (m, 12H); <sup>13</sup>C NMR (100 MHz, CDCl<sub>3</sub>) δ 166.83, 163.46, 162.91, 152.21, 151.12, 150.88, 146.34, 142.35, 131.49, 128.13, 127.85, 127.57, 127.51, 127.23, 126.33, 125.97, 124.77, 122.63, 121.80, 105.62, 44.72, 44.52, 39.18, 37.88, 37.52, 30.70, 30.54, 28.67, 24.22, 24.01, 23.07, 15.58, 14.09, 10.70, 10.61. MALDI-TOF m/z: calcd. for C<sub>37</sub>H<sub>45</sub>N<sub>7</sub>O<sub>4</sub>: 651.35; found: 652.18 (M + H)<sup>+</sup>.

### Synthesis of A-NDI-A<sup>1</sup>

In a clean dried 50 mL reaction RB charged with dibromo Naphthalene diimide derivative (Br-NDI-Br)<sup>2</sup> (150 mg, 0.263 mmol), alkylated adenine (1) (66.59 mg, 0.395 mmol) and weak base K<sub>2</sub>CO<sub>3</sub> (164 mg, 1.187 mmol) in dry toluene (10 mL) solvent. Addition of catalyst Pd<sub>2</sub>(dba)<sub>3</sub> (10 mmol %) and pivallic acid (121.33 mg, 1.187 mmol) respectively at room temperature under N<sub>2</sub> atmosphere. Kept reaction at 90 °C for 16 h to change colour yellow to dark Blue, after completion of starting material cool reaction mixture at rt. evaporated the solvent on rota evaporation and purified the dark blue color compound on column chromatography over silica

gel in DCM system and washed with pentane to yield (70% ) dark blue solid **A-NDI-A**.  $^1\text{H}$  NMR (400 MHz,  $\text{CDCl}_3$ )  $\delta$  13.14 (s, 2H), 10.76 (s, 2H), 8.76 (s, 2H), 8.01 (s, 2H), 4.33 – 4.22 (m, 6H), 2.09 – 1.97 (m, 1H), 1.55 (s, 6H), 1.40 – 1.23 (m, 16H), 0.88 (t,  $J = 7.4$  Hz, 3H), 0.82 (t,  $J = 7.0$  Hz, 3H).  $^{13}\text{C}$  NMR (125 MHz,  $\text{CDCl}_3$ )  $\delta$  166.90, 162.88, 152.78, 152.37, 151.07, 150.62, 143.54, 142.00, 126.16, 126.08, 123.06, 122.44, 106.89, 44.75, 39.13, 37.52, 33.19, 31.92, 30.61, 30.26, 29.70, 29.36, 28.64, 26.72, 23.94, 23.15, 15.60, 14.12, 10.75. MALDI-TOF  $m/z$ : calcd. for  $\text{C}_{44}\text{H}_{52}\text{N}_{12}\text{O}_4$ : 812.42; found: 813.40 ( $\text{M} + \text{H}$ ) $^+$ .

### Synthesis of Alkylated Adenine (**2**)<sup>3</sup>

In a 100 mL oven dried reaction RB added the compound of adenine (1 g, 0.00305 mole) and  $\text{Cs}_2\text{CO}_3$  (4.82 g, 0.0148 mole) in dried DMF (30 mL). After stirring at rt for 15 min addition of bromo ethane (1 mL) by syringe in a reaction mixture. Heat the reaction mixture at 50 °C for 36 h, after completion of reaction the solvent evaporated on rota evaporation to give white solid residue. Separate the compound in column chromatography over silica gel in 1% (DCM - MeOH) system to give white crystalline compound 62% yield.  $^1\text{H}$  NMR (400 MHz,  $\text{DMSO-d}_6$ ):  $\delta$  8.15 (s, 1 H), 8.13 (s, 1 H), 7.16 (br s, 2 H), 4.19-4.13 (q,  $J = 7.3$  Hz, 2 H), 1.39 (t,  $J = 7.3$  Hz, 3 H);  $^{13}\text{C}$  NMR (100 MHz,  $\text{DMSO-d}_6$ ):  $\delta$  155.9, 152.3, 149.3, 140.4, 118.8, 38.0, 15.3; ESI-MS ( $m/z$ ): [ $\text{M} + \text{H}$ ] $^+$  calcd. for  $\text{C}_7\text{H}_9\text{N}_5$ , 164.1; found, 164.9.

### Preparation of Stock Solution:

- 1] NDI-A = 3.9 mg in 3 mL DCM.
- 2] A-NDI-A = 4.8 mg in 3 mL DCM
- 3] TBAF (Tetrabutyl ammonium fluoride) = 9.45 mg in 3 mL DCM.

### Solution Preparation for Measurements:

1] 15  $\mu\text{L}$  (micro litre) of **NDI-A** from stock solution and 150  $\mu\text{L}$  (micro litre) of **TBAF** in 2835  $\mu\text{L}$  (micro litre) DCM. It makes addition of 50 equiv. of **TBAF** in **NDI-A** for measurements.

2] 15  $\mu\text{L}$  (micro litre) of **A-NDI-A** from stock solution and 150  $\mu\text{L}$  (micro litre) of **TBAF** in 2835  $\mu\text{L}$  (micro litre) DCM. It makes addition of 50 equiv. of **TBAF** in **A-NDI-A** for measurements.

### **UV-Vis spectroscopy**

Absorption spectra were measured on a UV-vis-1800 Shimadzu absorption spectrometer using 1 cm quartz cells. All solvents were of spectroscopic grade (purchased from Fisher) and stored over 4  $\text{\AA}$  molecular max was then plotted against the concentration in all  $\lambda$ . The absorption intensity at cases to confirm, by linearity, that the compounds followed Beer's law. Molar extinction coefficients ( $\epsilon$ ) were determined from the linear plot for each compound (where  $A = \epsilon bc$ ). A 15  $\mu\text{l}$  of **NDI-A**, **A-NDI-A** from  $1 \times 10^{-2}$  M stock solution were transferred to a vial and made up to a final volume of 3 mL ( $1 \times 10^{-5}$  M) in DCM. For thin film measurements, samples were prepared using spin coating method.

### **Fluorescence spectroscopy**

Fluorescence emission spectra were measured on an RF-6000 (Shimadzu, Japan) spectrofluorophotometer. All experiments were performed in a quartz cell with a 1 cm path length. Measurement done in the final volume of 3 mL  $10^{-5}$  M in DCM which is made up from 15  $\mu\text{l}$  of  $1 \times 10^{-2}$  M stock solution of **NDI-A** and **A-NDI-A**.

### **Cyclic voltammetry experiments<sup>4</sup>**

The CV measurements were performed at room temperature by using a Power Lab ML160 potentiostat interfaced via a Power Lab4/20 controller to a PC running E-Chem for Windows version 1.5.2. A single compartment three-electrode cell with a glassy counter electrode, a ( $\text{Hg}_2\text{Cl}_2(\text{s}) + 2\text{e}^-$ ) Calomel electrode as reference electrode, and a platinum electrode as the

counter electrode. Electrodes were purchased from either BASi, Inc. or CH Instruments. Tetrabutylammonium hexafluorophosphate (TBAPF<sub>6</sub>) was purchased from Aldrich and kept dry under vacuum. DCM was taken from Finar solvent company. The compounds of NDI-Adenine solid were dissolved to a concentration of a 0.1 M TBAPF<sub>6</sub>/DCM electrolyte. Potential sweeps were controlled by a Princeton Applied Research Versastat II potentiostat. The scan rate for CV was 100 mV/s.

$E_{\text{ox}}^{\text{onset}}$  and  $E_{\text{red}}^{\text{onset}}$  were determined from the onsets of oxidation and reduction, respectively.

$E_{\text{HOMO}}$ ,  $E_{\text{LUMO}}$ , and  $\Delta E$  were determined from equations S1, S2 and S3, respectively.

$$E_{\text{HOMO}} = - (E_{\text{onset}}^{\text{ox}} + 4.7) \text{ eV} \dots\dots\dots\text{equiv. S1}$$

$$E_{\text{LUMO}} = - (E_{\text{onset}}^{\text{red}} + 4.7) \text{ eV} \dots\dots\dots\text{equiv. S2}$$

$$\Delta E = E_{\text{HOMO}} - E_{\text{LUMO}} \text{ eV} \dots\dots\dots\text{equiv. S3}$$

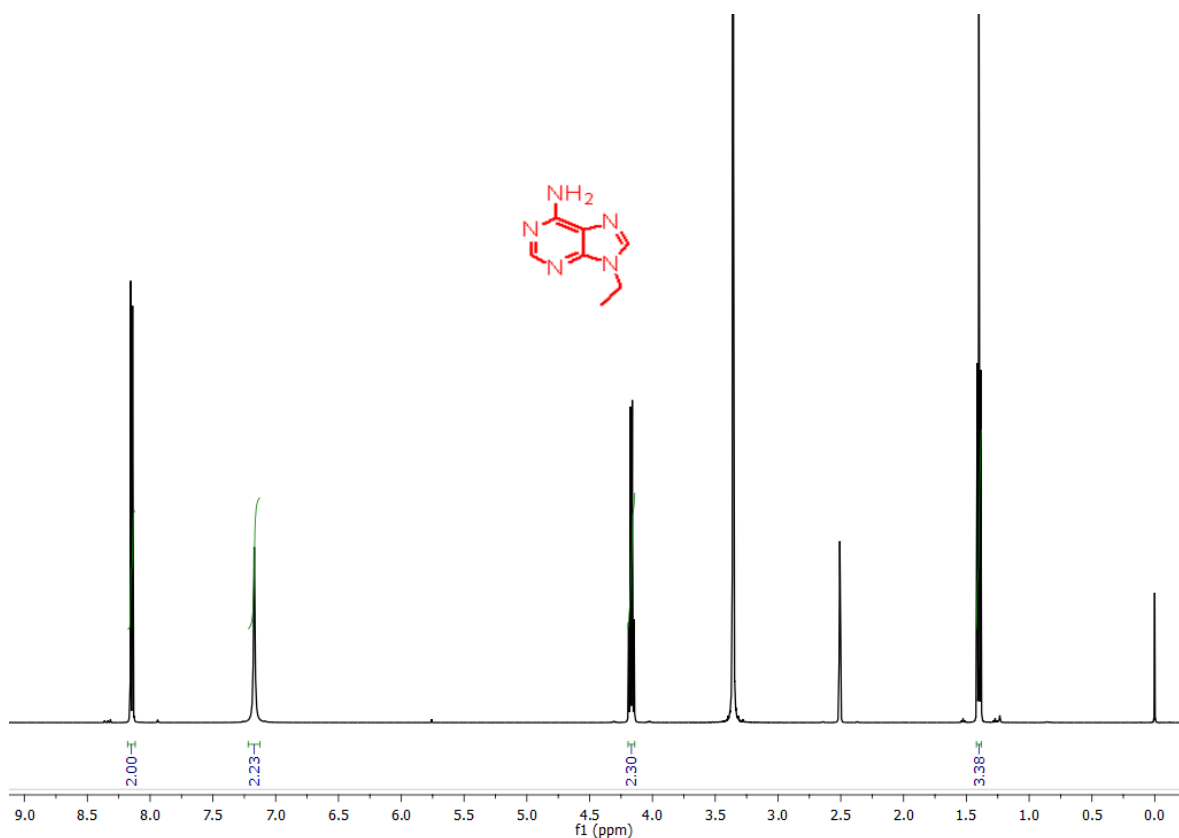

**Fig. S1** <sup>1</sup>H NMR spectra of **2**.

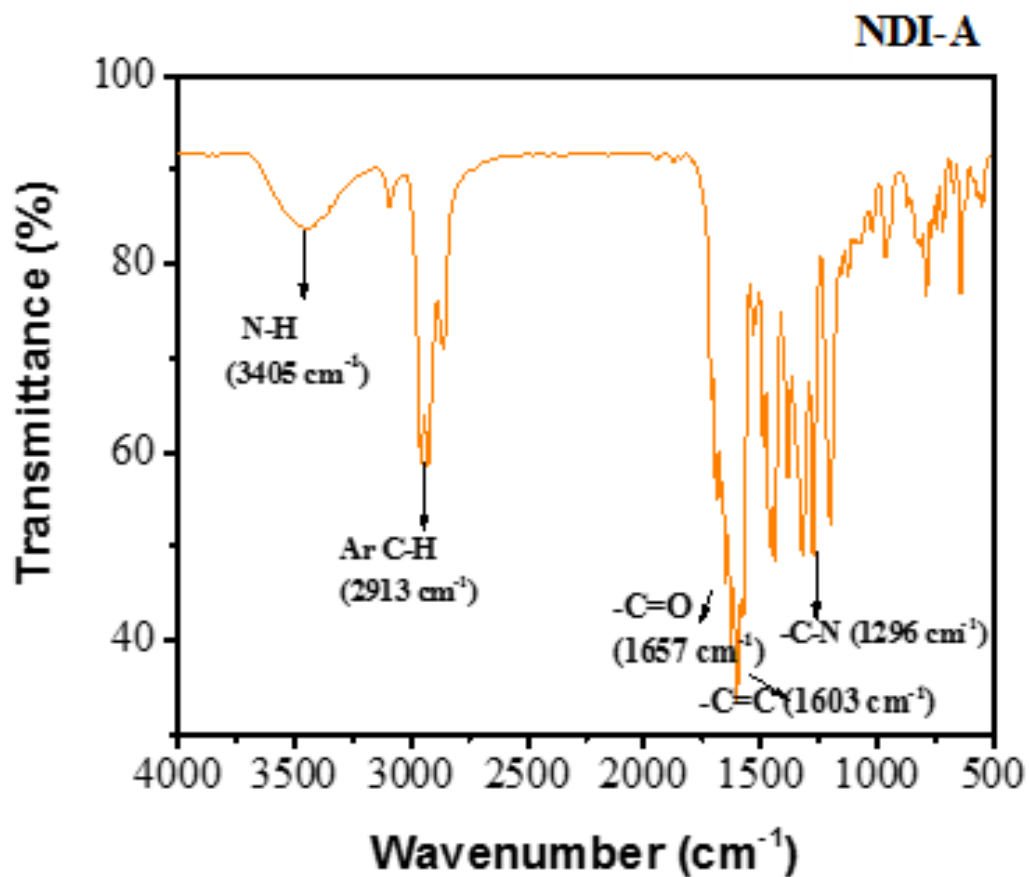

Fig. S2 FT-IR spectra of NDI-A

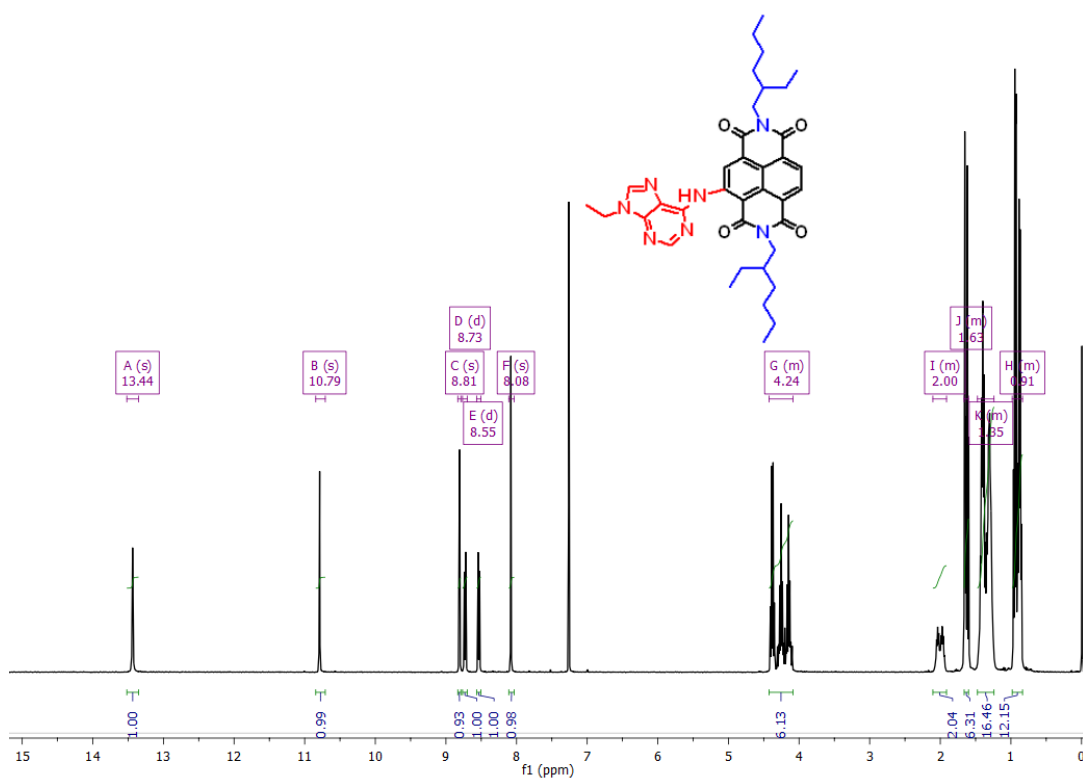

Fig.S3<sup>1</sup>H NMR spectra of NDI-A.

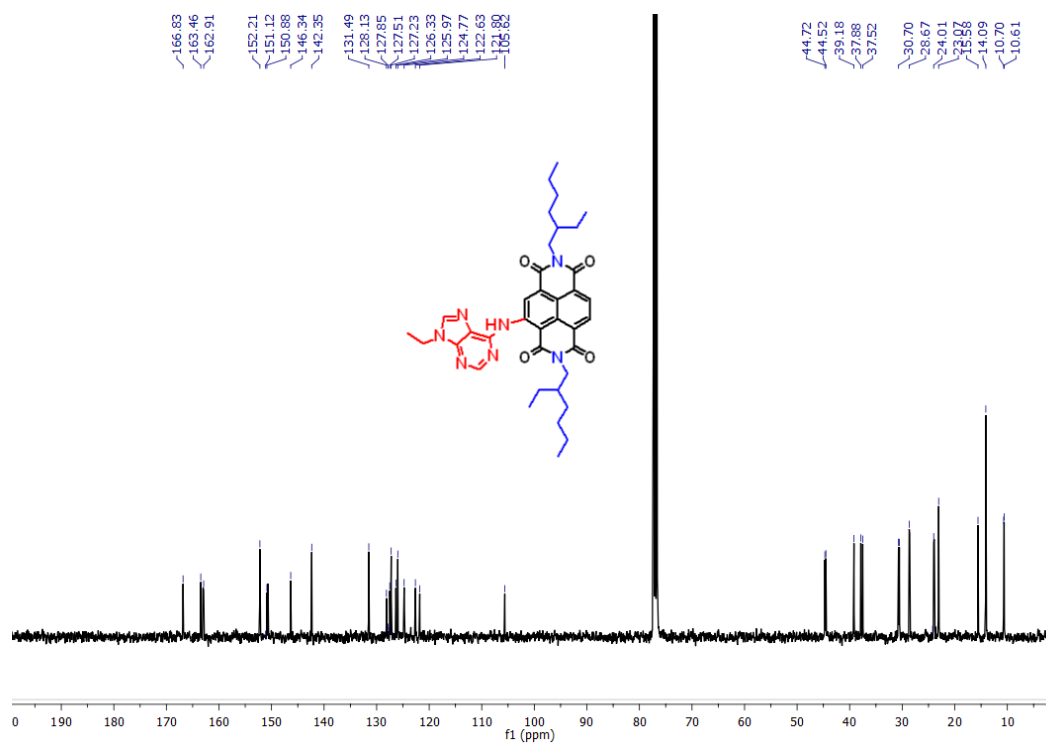

Fig.S4  $^{13}\text{C}$  NMR spectra of NDI-A.

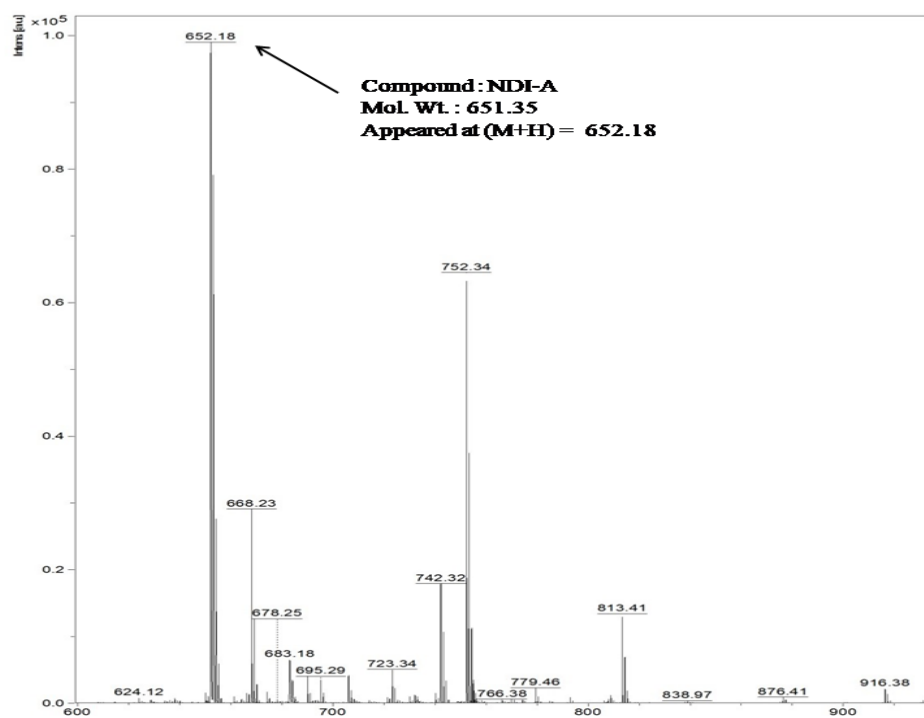

Fig. S5 MALDI-TOF spectrum of compound NDI-A.

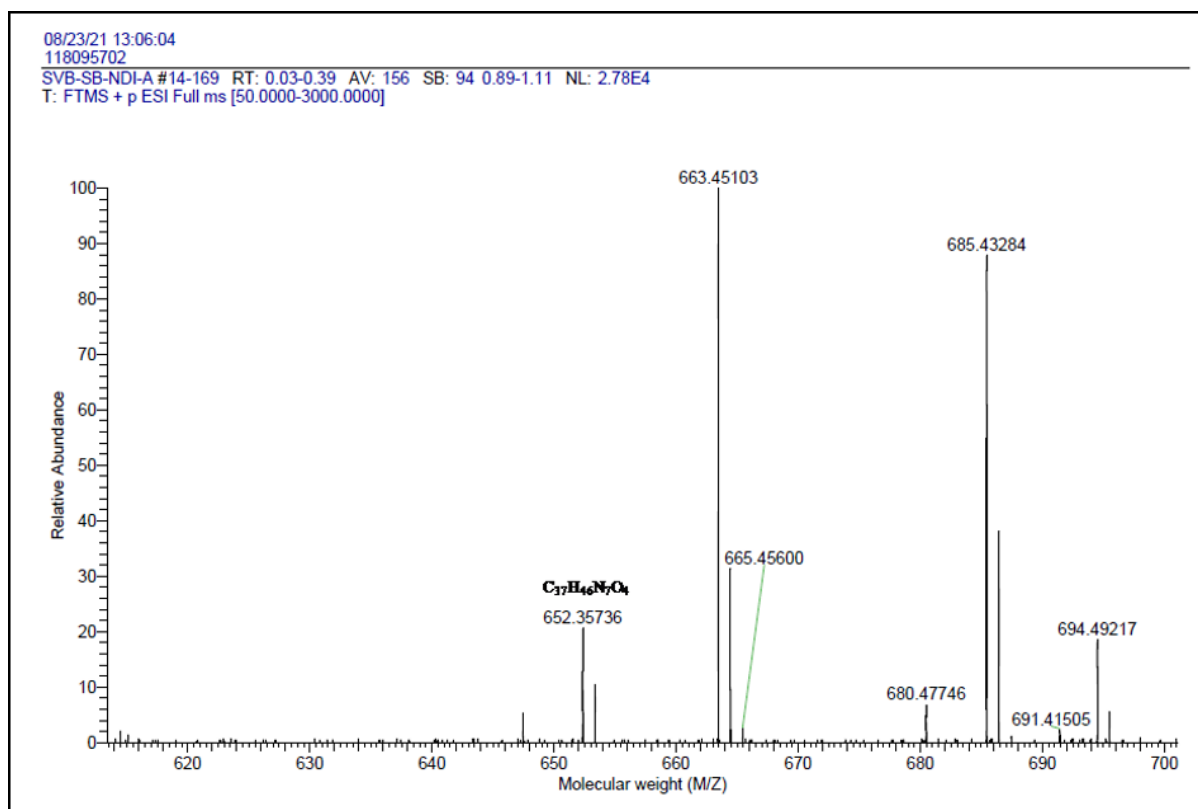

Fig. S6 HRMS spectrum of NDI-A

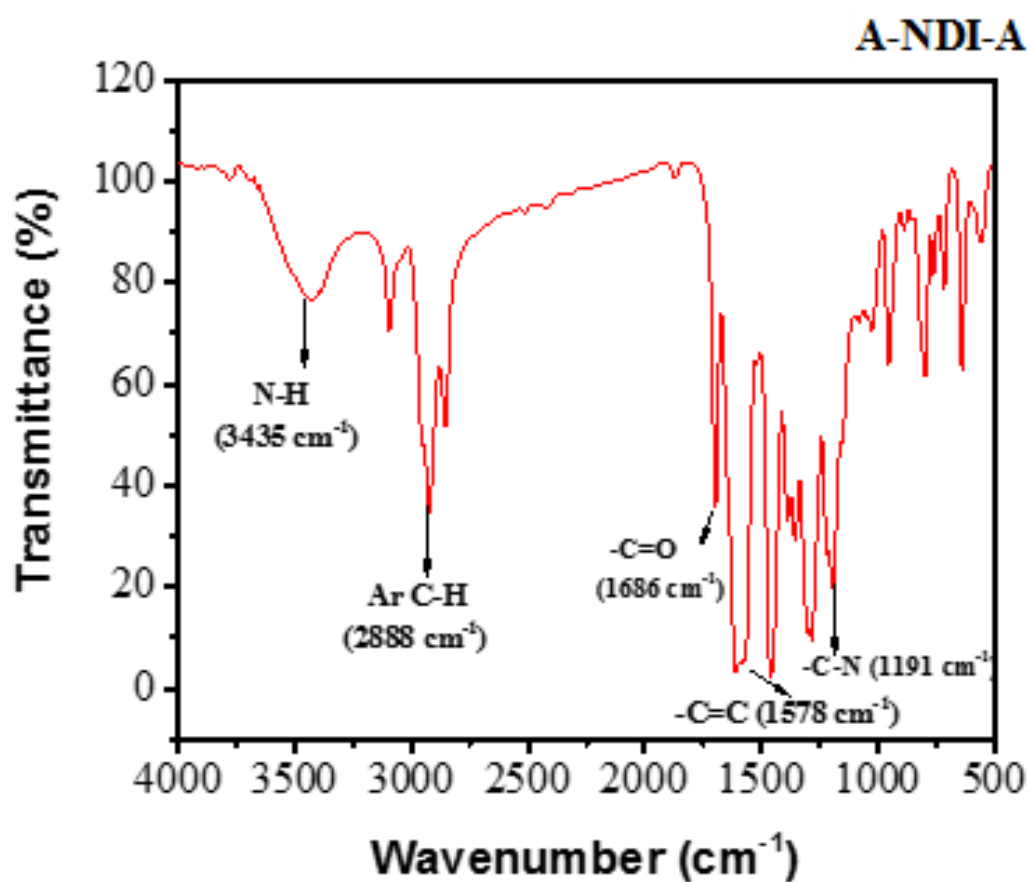

Fig S7FT-IR spectra of A-NDI-A



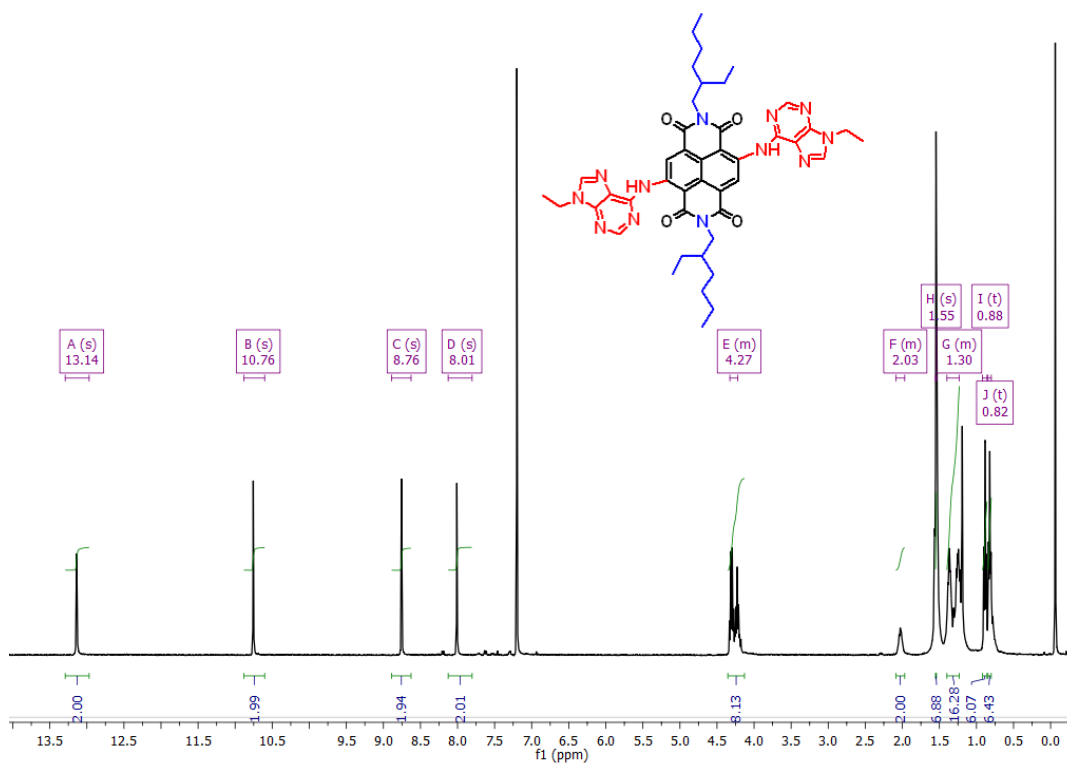

**Fig.S8**  $^1\text{H}$  NMR spectra of A-NDI-A.

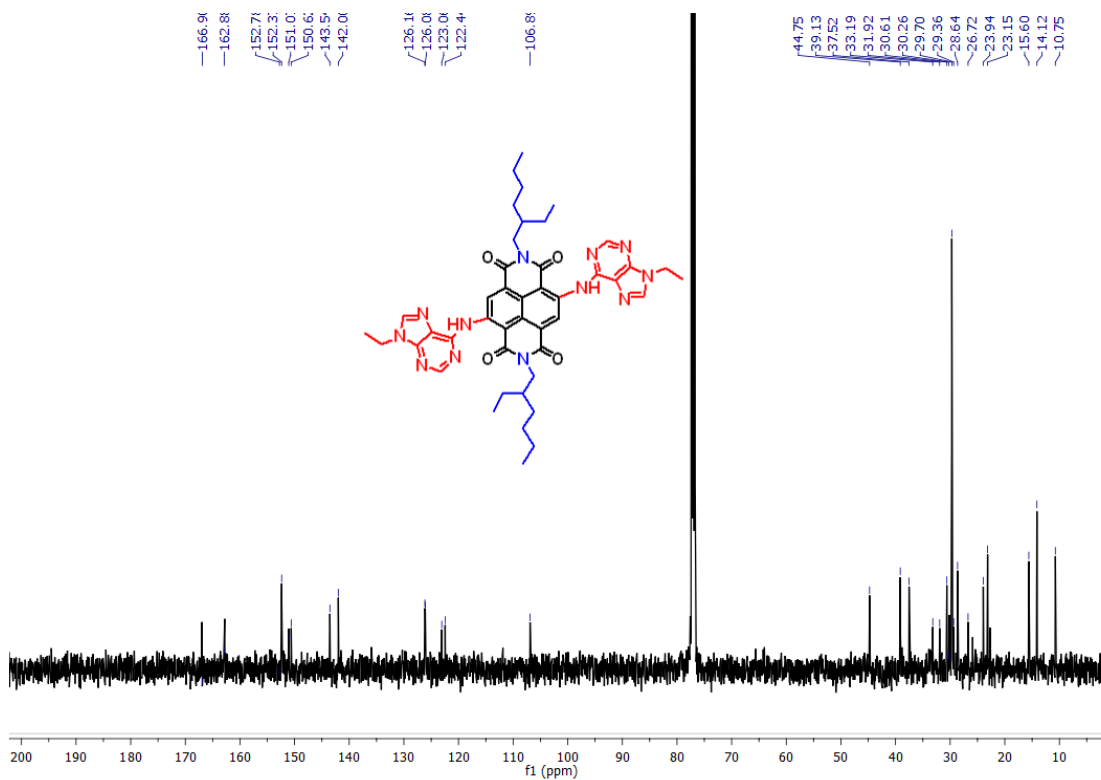

**Fig. S9**  $^{13}\text{C}$  NMR spectra of A-NDI-A.

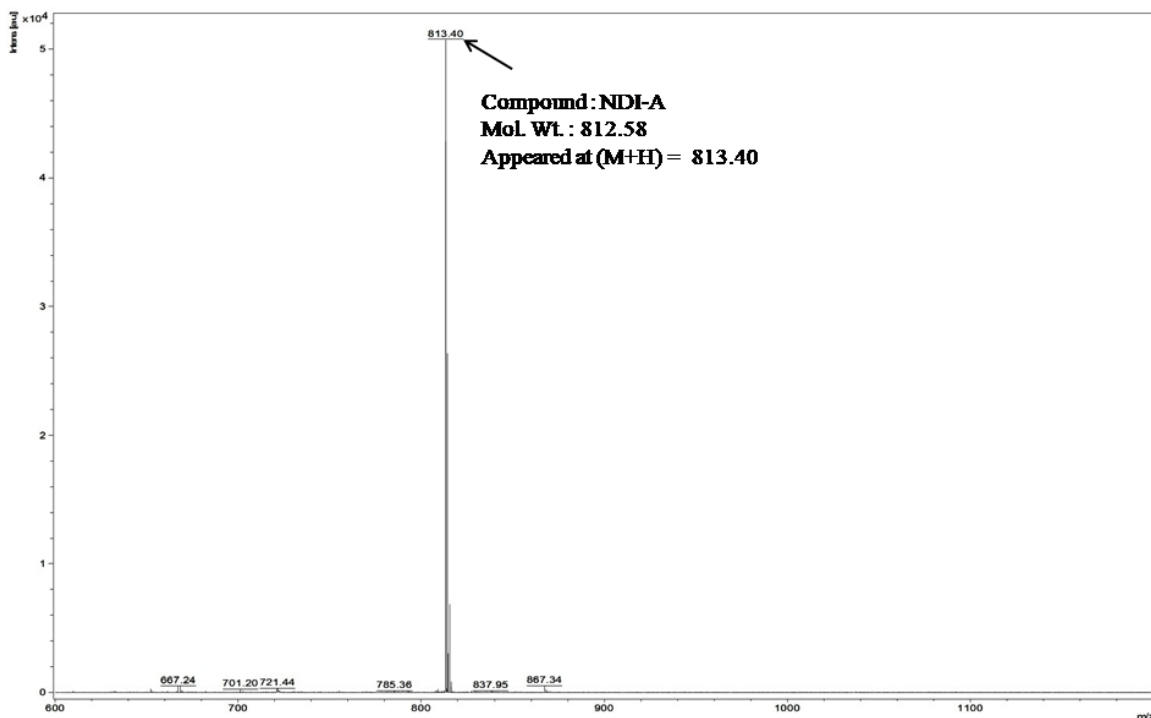

Fig. S10 MALDI-TOF spectrum of compound A-NDI-A.

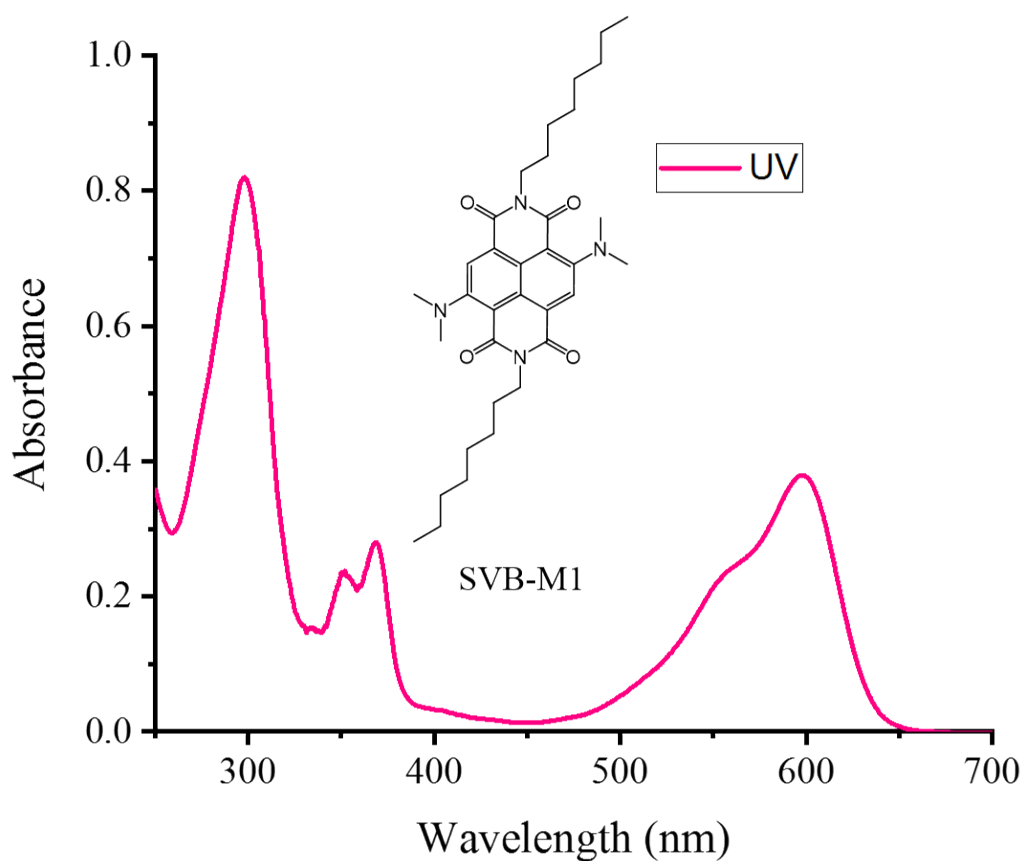

Fig. S11. UV-vis absorption spectra of SVB-M1 ( $1 \times 10^{-5}$  M) in dichloromethane.

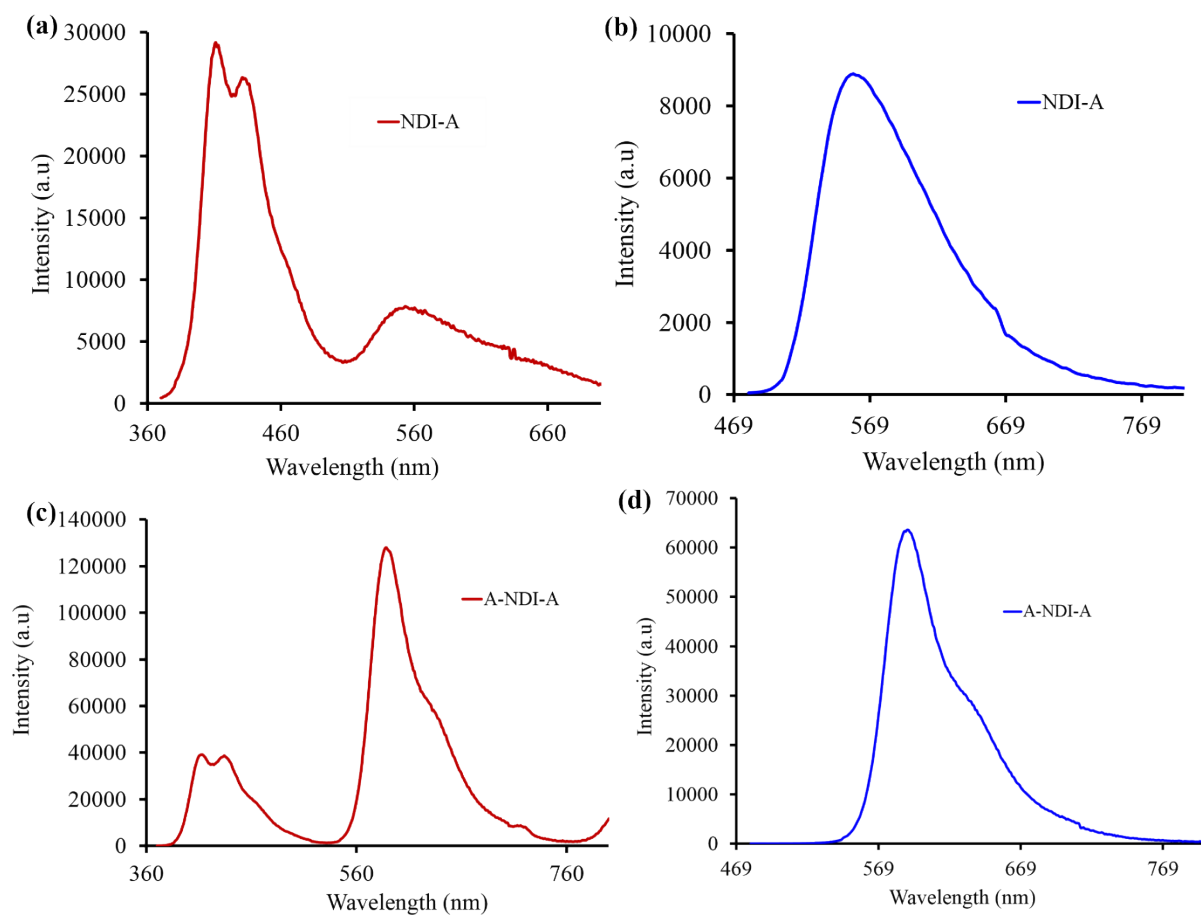

**Fig.S12** Fluorescence emission spectra of (a) NDI-A ( $1 \times 10^{-5}$  M),  $\lambda_{\text{ex}} = 360$  nm; (b) NDI-A ( $1 \times 10^{-5}$  M),  $\lambda_{\text{ex}} = 469$  nm and (c) A-NDI-A ( $1 \times 10^{-5}$  M),  $\lambda_{\text{ex}} = 360$  nm; (d) A-NDI-A ( $1 \times 10^{-5}$  M),  $\lambda_{\text{ex}} = 469$  nm in DCM.

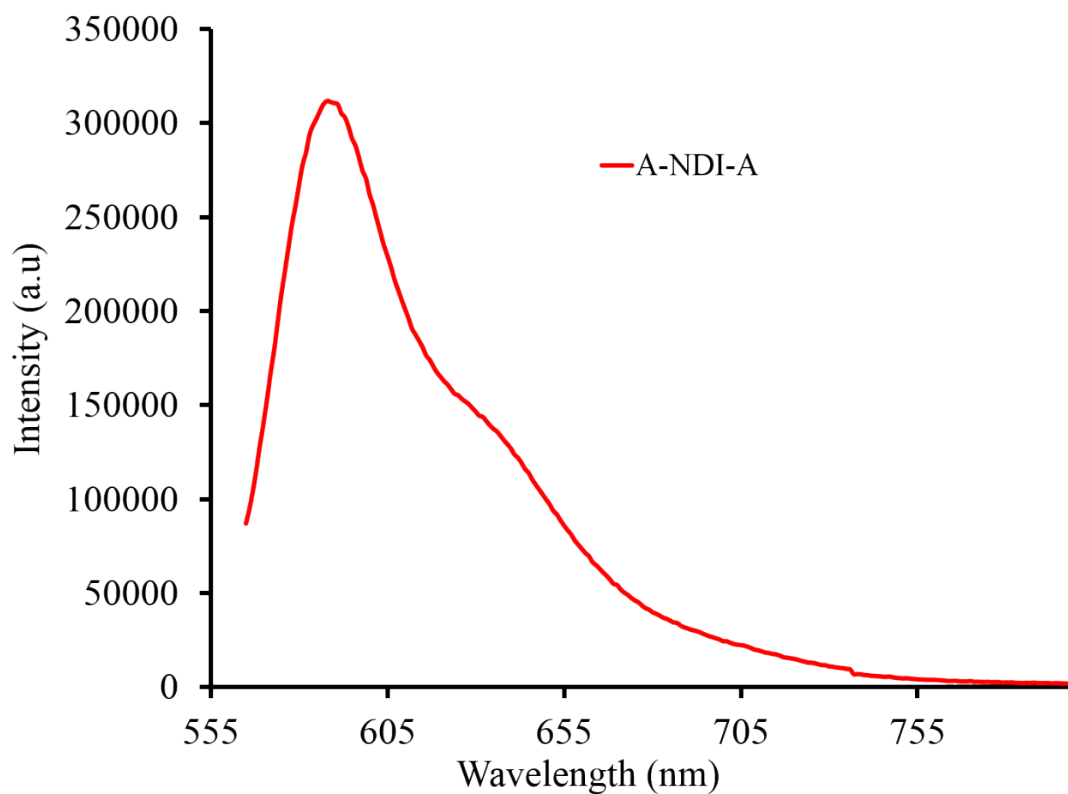

**Fig. S13** Fluorescence emission spectra of **A-NDI-A** ( $1 \times 10^{-5}$  M) in DCM with the  $\lambda_{\text{ex}} = 555$  nm.

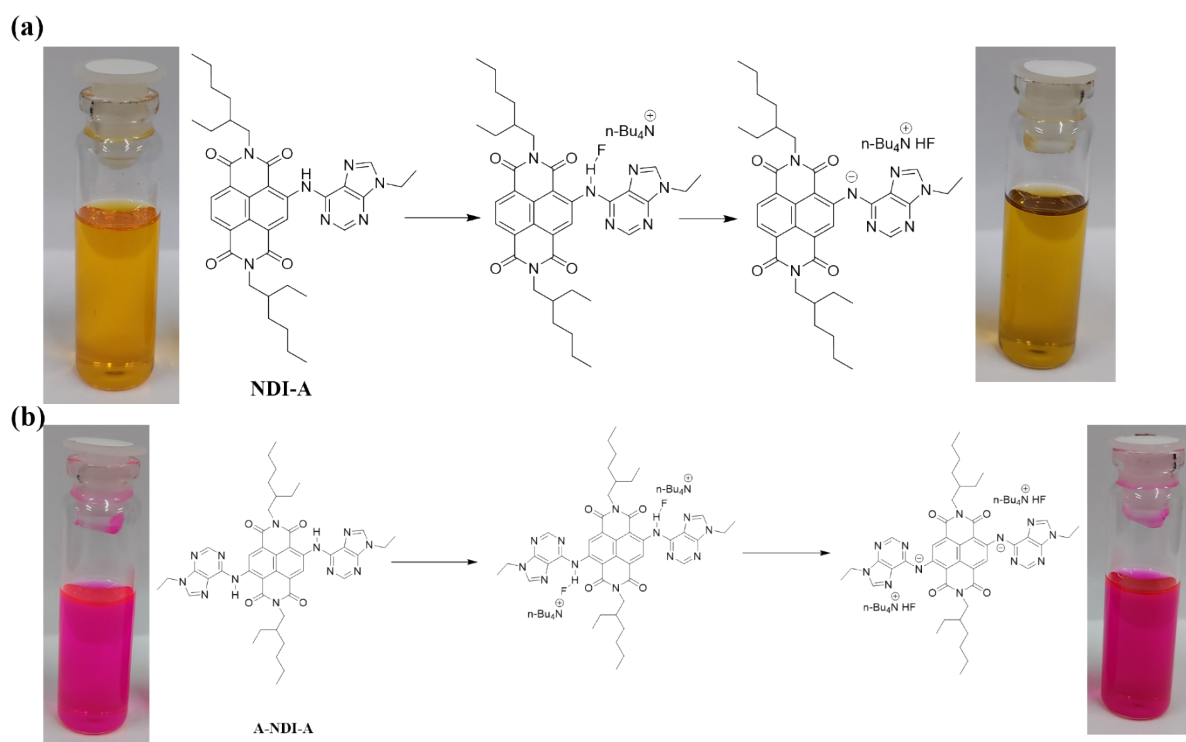

**Fig. S14** Colorimetric response of (a) **NDI-A** (0.4 mmol) and (b) **A-NDI-A** (0.4 mmol) in DCM upon addition of tetrabutyl ammonium fluoride (50 equiv.).

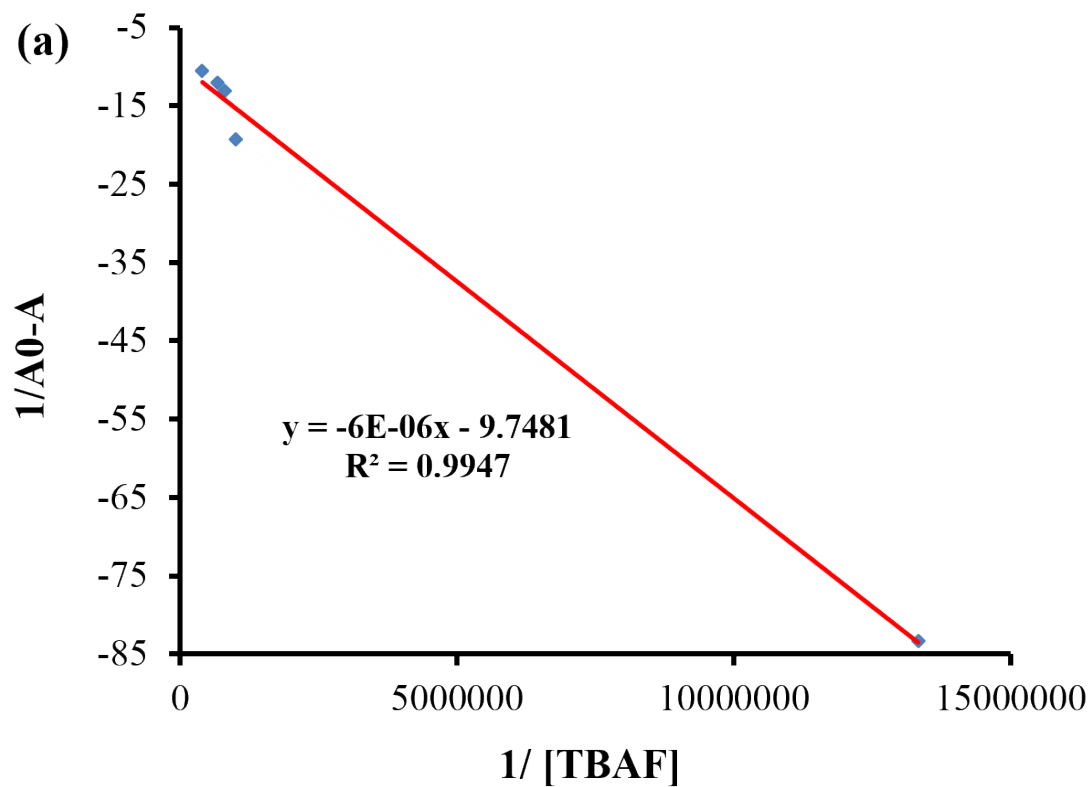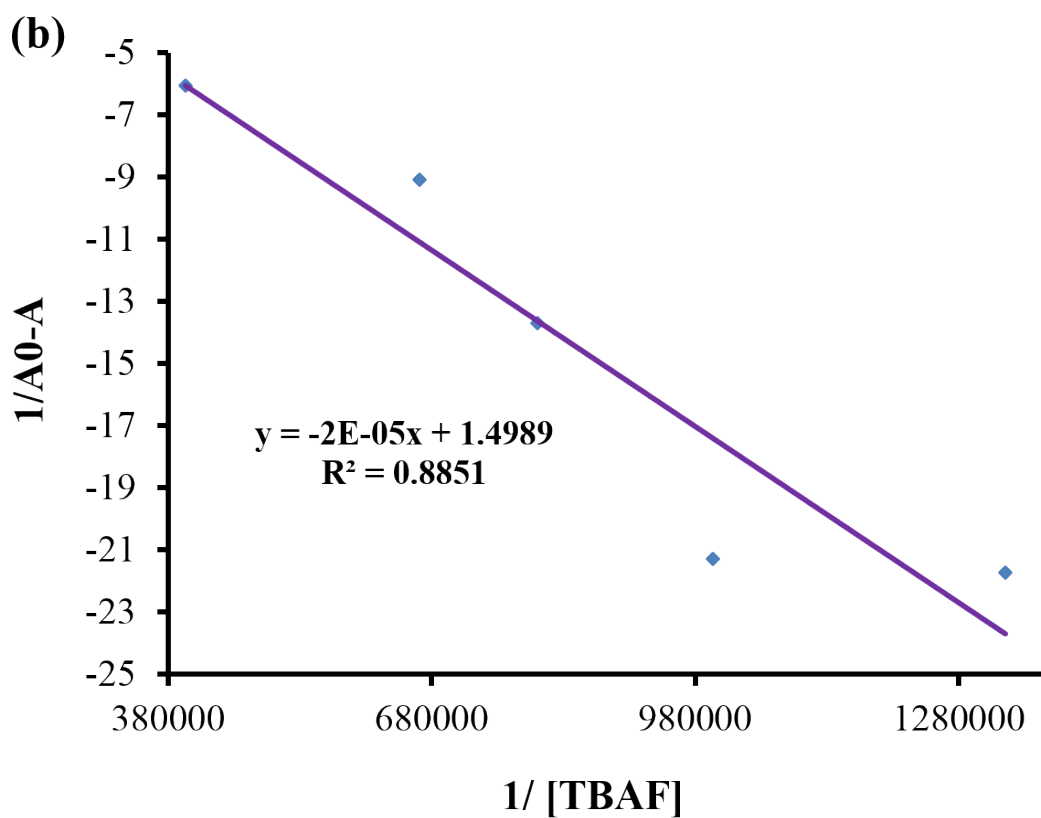

**Fig. S15** Benesi-Hildebrand plot for (a) NDI-A and (b) A-NDI-A upon addition of fluoride anion.

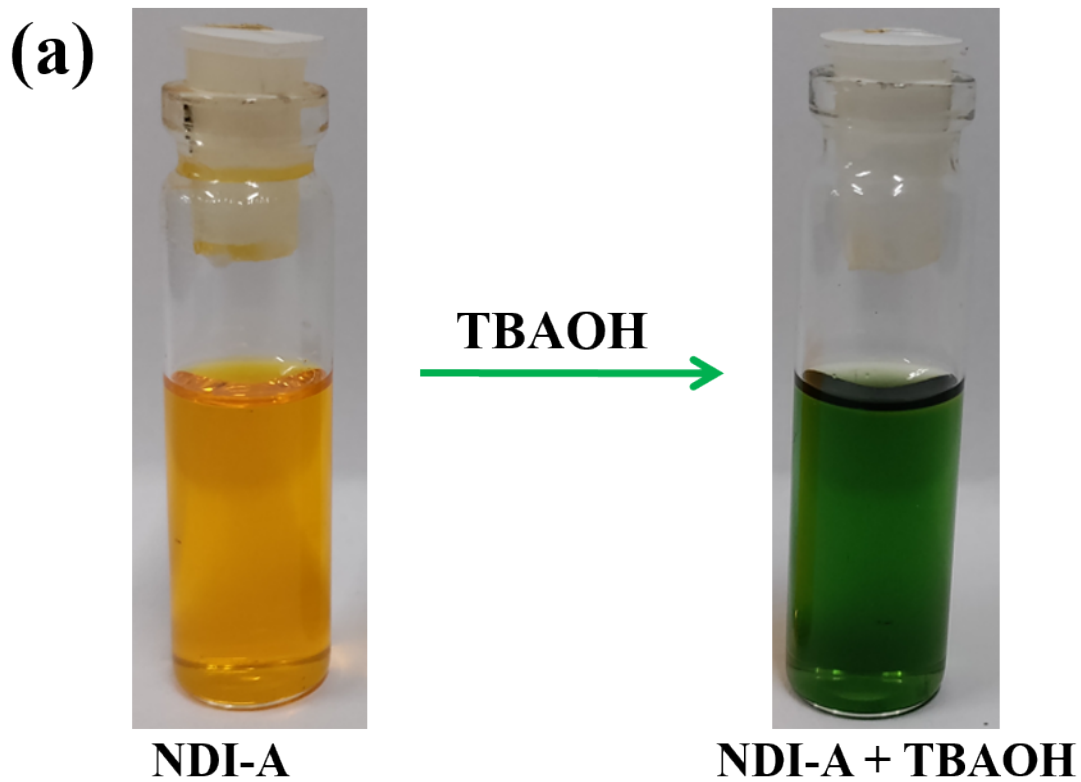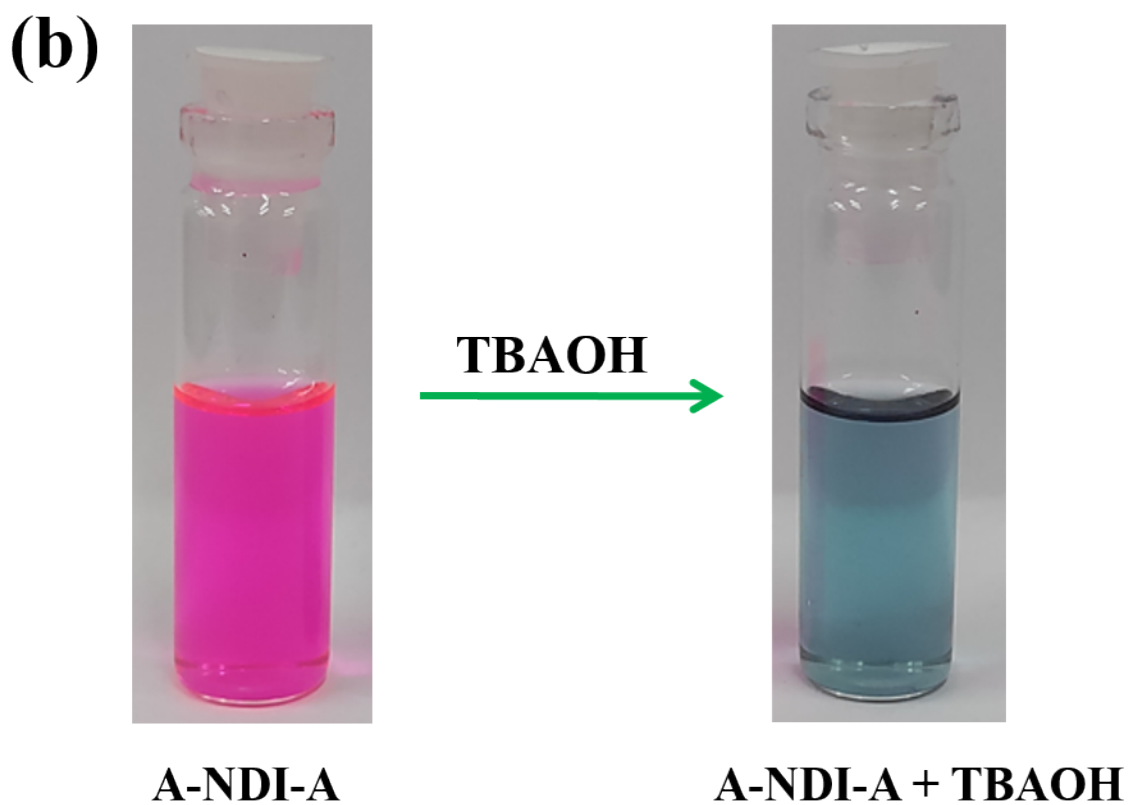

**Fig. S16** Colorimetric response of (a) NDI-A (0.4 mmol) and (b) A-NDI-A (0.4 mmol) in DCM upon addition of tetrabutyl ammonium hydroxide (TBAOH) (50 equiv.).

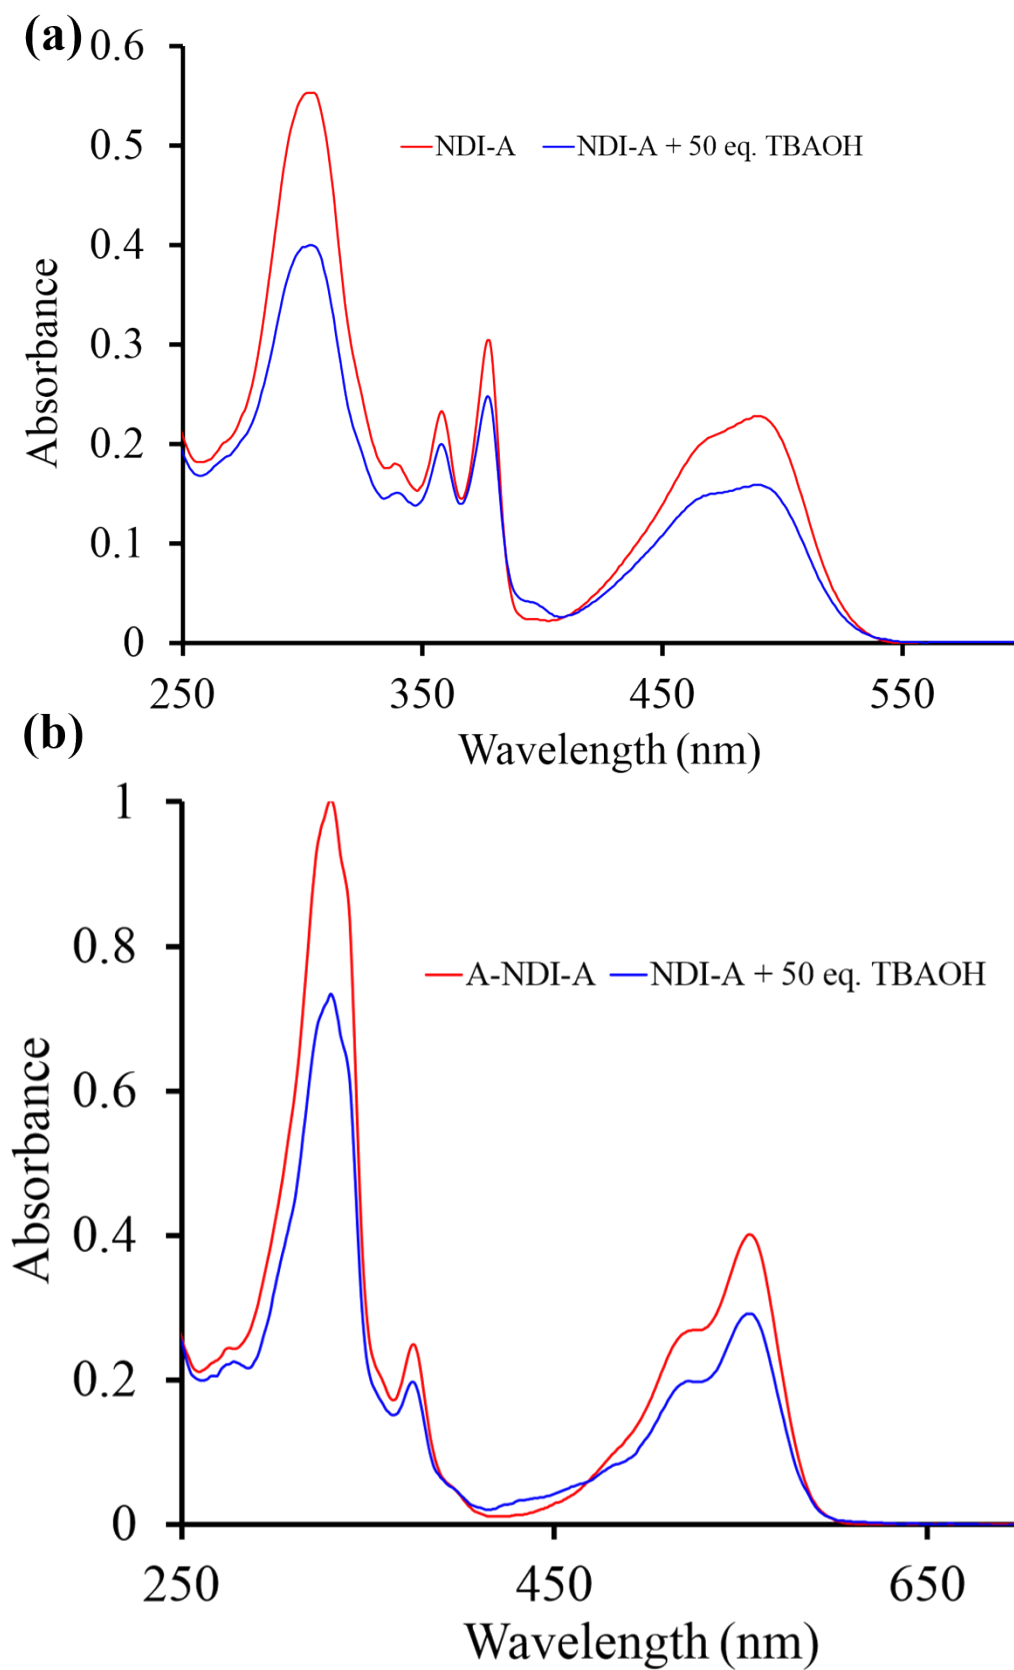

**Fig. S17** UV-vis absorption spectra of (a) NDI-A ( $1 \times 10^{-5}$  M) and (b) A-NDI-A ( $1 \times 10^{-5}$  M) with the addition of TBAOH in DCM.

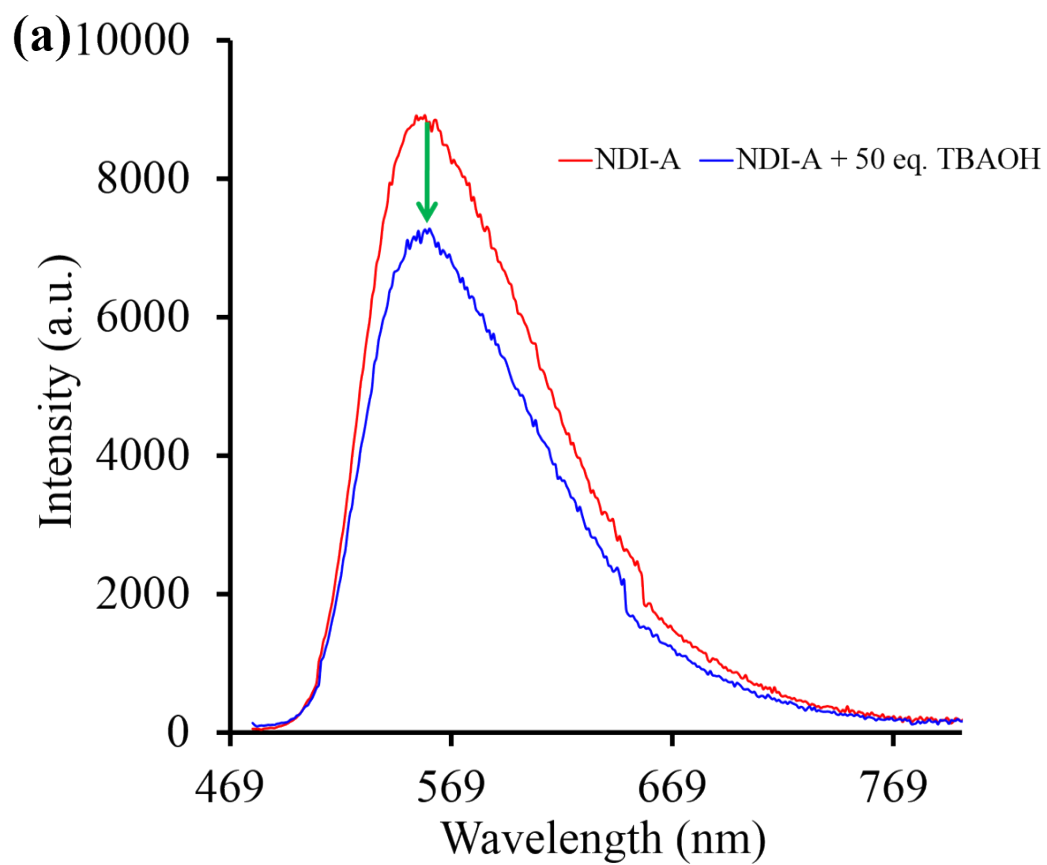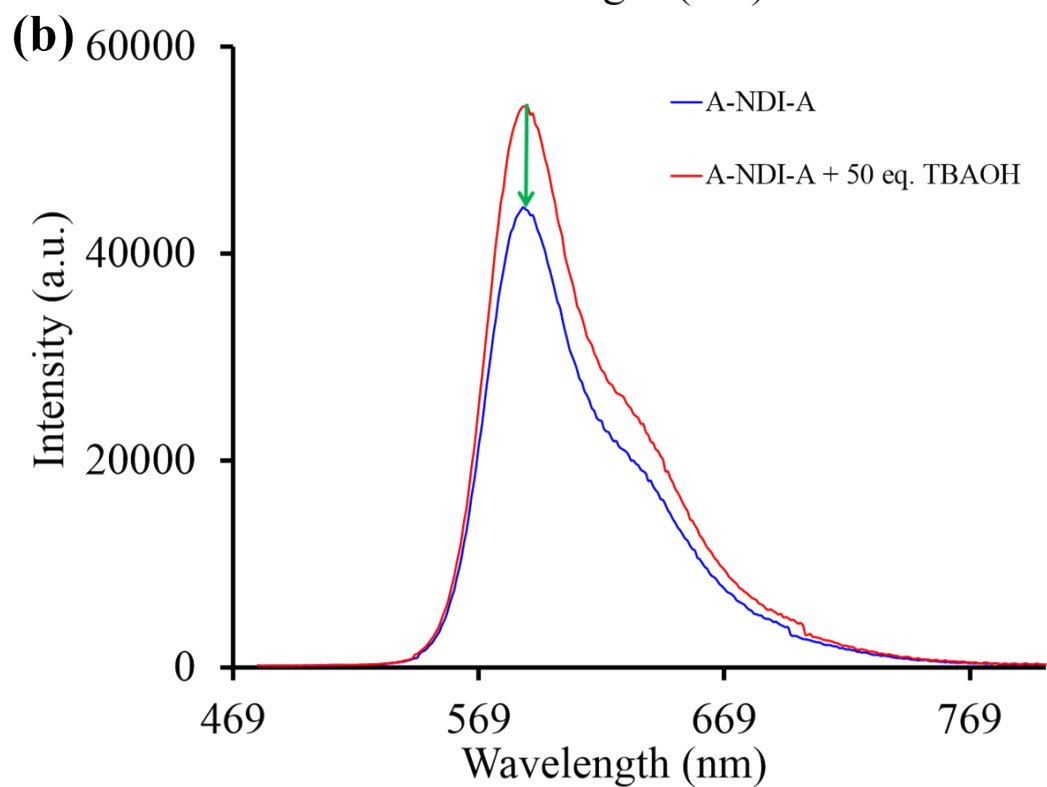

**Fig. S18** Fluorescence emission spectra ( $\lambda_{\text{ex}} = 469 \text{ nm}$ ) of (c) **NDI-A** ( $1 \times 10^{-5} \text{ M}$ ) and (d) **A-NDI-A** ( $1 \times 10^{-5} \text{ M}$ ) in DCM upon addition of TBAOH.



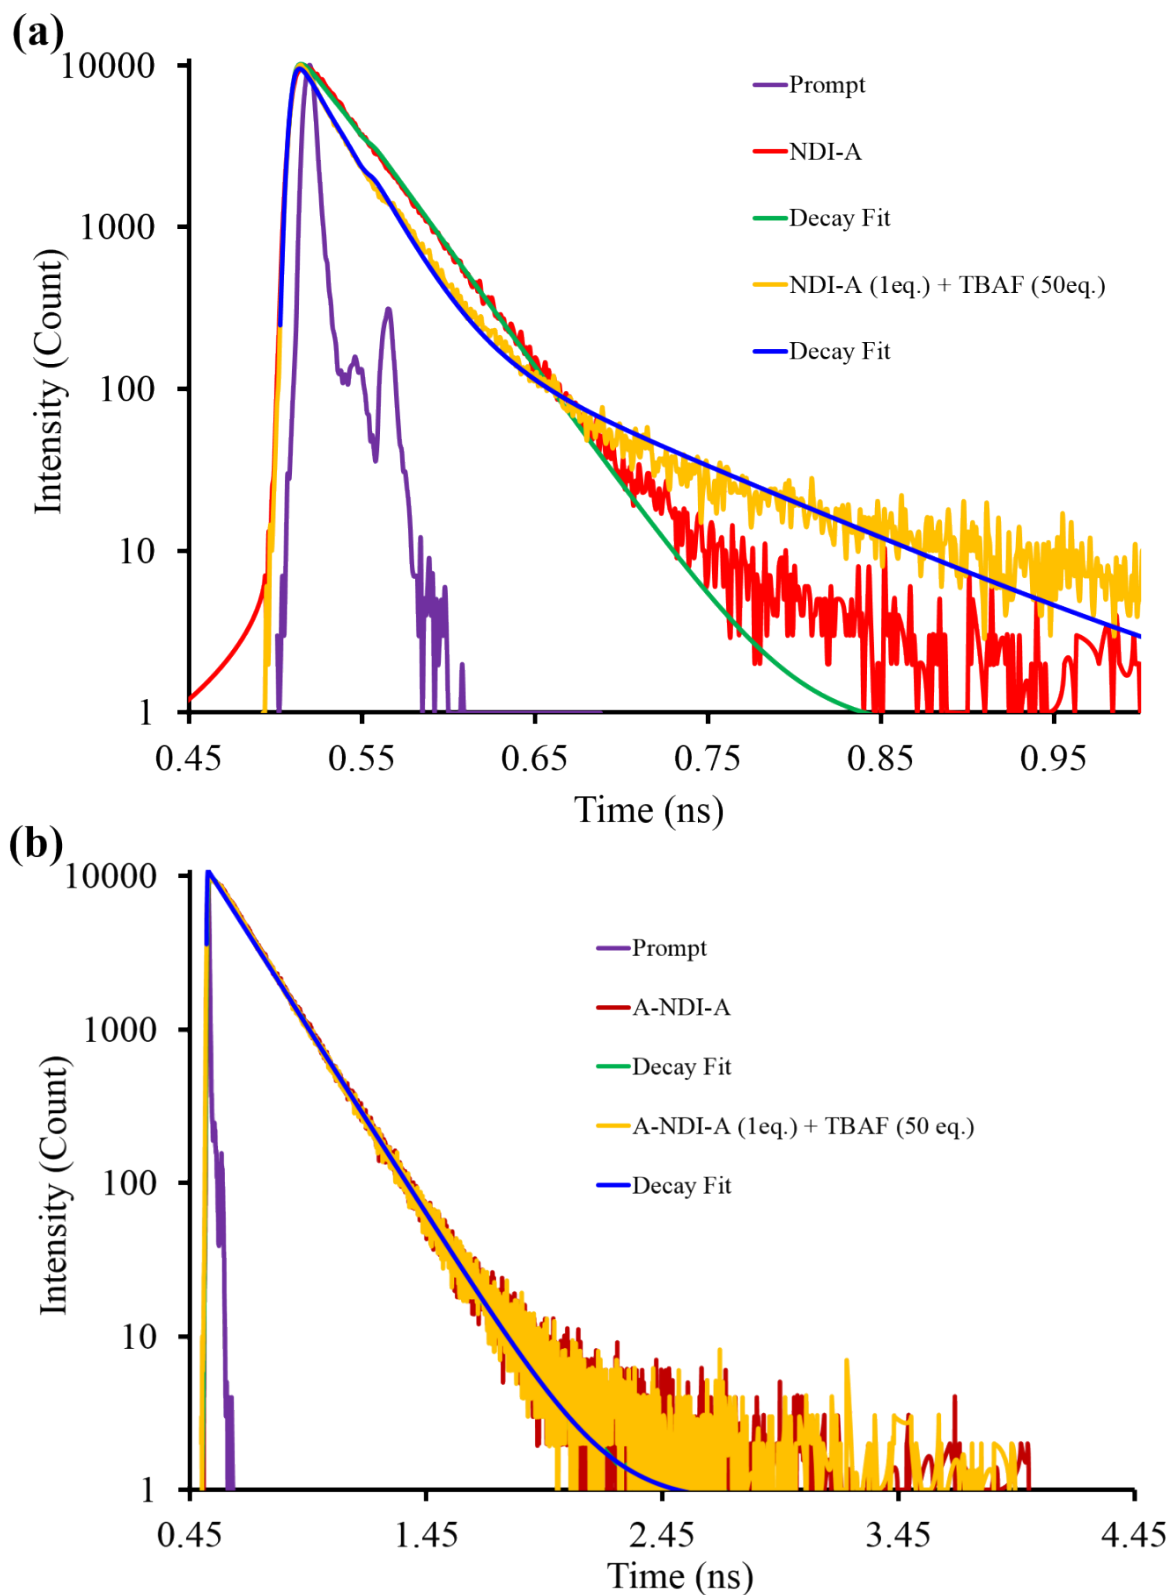

**Fig. S19** TCSPC spectra of (a) NDI-A ( $1 \times 10^{-5}$  M) and (b) A-NDI-A ( $1 \times 10^{-5}$  M) in dichloromethane upon addition of tetrabutyl ammonium fluoride (TBAF) anion.

**Table S1** Excitation and emission wavelength for TCSPC measurements.

| Sr.no. | Compound       | Excitation wavelength | Emission wavelength |
|--------|----------------|-----------------------|---------------------|
| 1.     | <b>NDI-A</b>   | 469nm /2.64 eV        | 560nm /2.21 eV      |
| 2.     | <b>A-NDI-A</b> | 469nm/2.64 eV         | 588nm /2.10 eV      |

**Table S2**TCSPC calculation for NDI-A, A-NDI-A and upon addition of TBAF (50 equiv.) and average life time.

| Compound                         | $\tau_1$ (nS) | Contribution (%) | $\tau_2$ (nS) | Contribution (%) | Average life time |
|----------------------------------|---------------|------------------|---------------|------------------|-------------------|
| <b>NDI-A</b>                     | 0.8326        | 100              | -             | -                | 0.8326            |
| <b>NDI-A(1eq.)+TBAF(50eq.)</b>   | 0.5799        | 88.69            | 0.2697        | 11.31            | 0.5448            |
| <b>A-NDI-A</b>                   | 0.1831        | 100              | -             | -                | 0.1831            |
| <b>A-NDI-A(1eq.)+TBAF(50eq.)</b> | 0.1907        | 100              | -             | -                | 0.1907            |

**Fig. S20** Frontier molecular orbitals of NDI-A, A-NDI-A, NDI-A+TBAF, and A-NDI-A+2TBAF with energy in eV.

| Orbital      | Orbital number | Energy (eV) | Orbital Picture                                                                      |
|--------------|----------------|-------------|--------------------------------------------------------------------------------------|
| <b>NDI-A</b> |                |             |                                                                                      |
| L+2          | 117            | -1.318eV    | 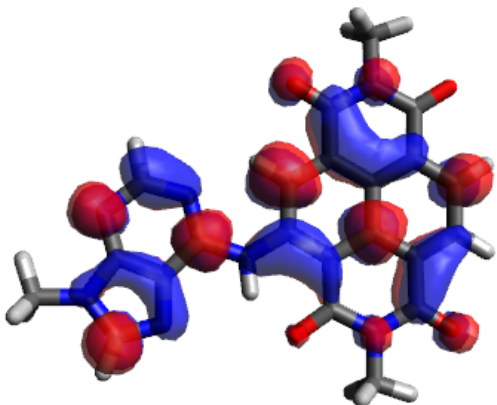   |
| L+1          | 116            | -1.486eV    |   |
| L            | 115            | -3.139eV    |  |

|                |     |          |                                                                                      |
|----------------|-----|----------|--------------------------------------------------------------------------------------|
| H              | 114 | -6.051eV | 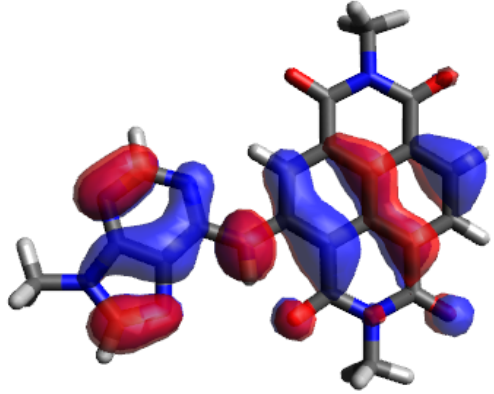   |
| H-1            | 113 | -6.883eV |   |
| H-8            | 106 | -7.626eV |  |
| <b>A-NDI-A</b> |     |          |                                                                                      |
| L+2            | 155 | 1.234eV  |  |

|                   |     |          |                                                                                      |
|-------------------|-----|----------|--------------------------------------------------------------------------------------|
| L                 | 153 | -2.973eV | 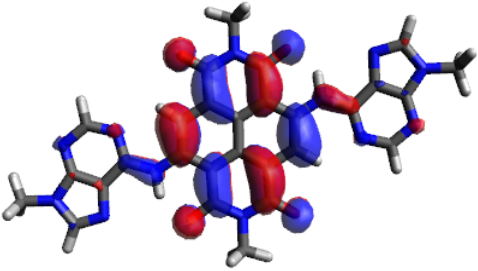   |
| H                 | 152 | -5.546eV |    |
| H-2               | 150 | -6.758eV |   |
| H-11              | 141 | -7.535eV |  |
| <b>NDI-A+TBAF</b> |     |          |                                                                                      |

|     |     |          |                                                                                      |
|-----|-----|----------|--------------------------------------------------------------------------------------|
| L+2 | 143 | -0.611eV | 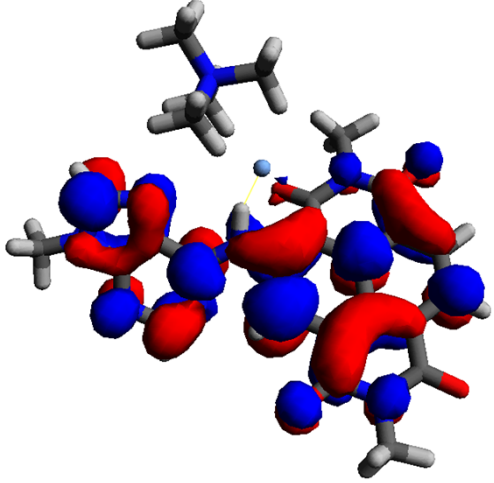   |
| L+1 | 142 | -0.823eV |   |
| L   | 141 | -2.483eV |  |

|     |     |          |                                                                                                                                                                                                                                                                                                               |
|-----|-----|----------|---------------------------------------------------------------------------------------------------------------------------------------------------------------------------------------------------------------------------------------------------------------------------------------------------------------|
| H   | 140 | -5.256eV | 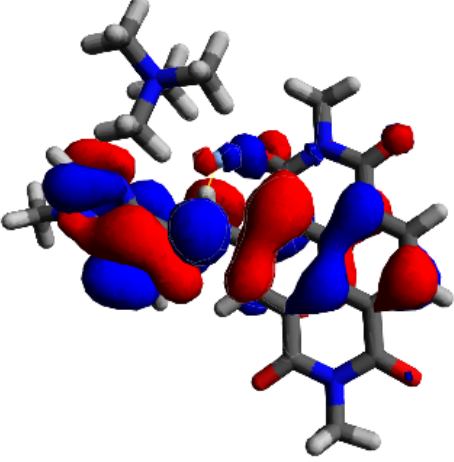 A 3D molecular orbital visualization of orbital H. The molecule is shown in a ball-and-stick model with red and blue lobes representing the orbital's phase. The orbital is localized on the central part of the molecule. |
| H-1 | 139 | -6.163eV |  A 3D molecular orbital visualization of orbital H-1. The molecule is shown in a ball-and-stick model with red and blue lobes. The orbital is localized on the right side of the molecule.                                 |
| H-2 | 138 | -6.477eV |  A 3D molecular orbital visualization of orbital H-2. The molecule is shown in a ball-and-stick model with red and blue lobes. The orbital is localized on the left side of the molecule.                                 |

|     |     |          |                                                                                      |
|-----|-----|----------|--------------------------------------------------------------------------------------|
| H-3 | 137 | -6.570eV | 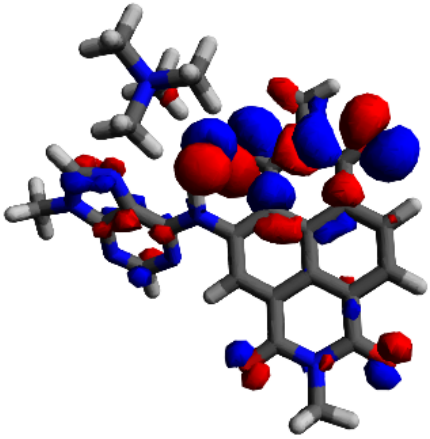   |
| H-7 | 133 | -6.857eV |   |
| H-8 | 132 | -6.953eV |  |



|                      |     |           |                                                                                      |
|----------------------|-----|-----------|--------------------------------------------------------------------------------------|
| H-10                 | 130 | -7.022 eV | 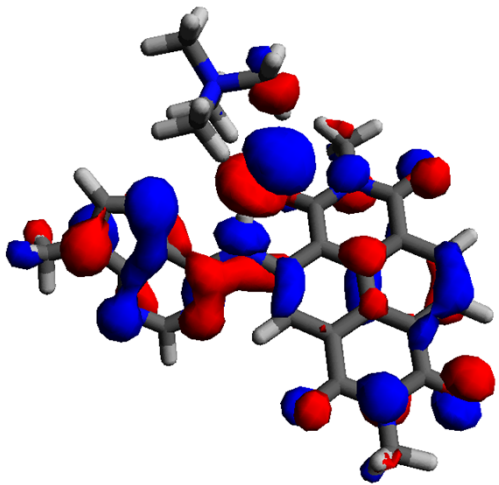   |
| H-11                 | 129 | -7.123eV  |   |
| H-13                 | 127 | -7.468eV  |  |
| <b>A-NDI-A+2TBAF</b> |     |           |                                                                                      |

|     |     |          |                                                                                      |
|-----|-----|----------|--------------------------------------------------------------------------------------|
| L+2 | 207 | -0.193eV | 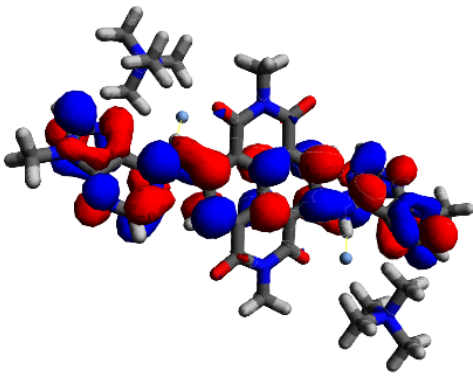   |
| L   | 205 | -1.837eV |    |
| H   | 204 | -4.533eV |  |
| H-2 | 202 | -5.568eV |  |

|     |     |          |                                                                                    |
|-----|-----|----------|------------------------------------------------------------------------------------|
| H-9 | 195 | -6.277eV | 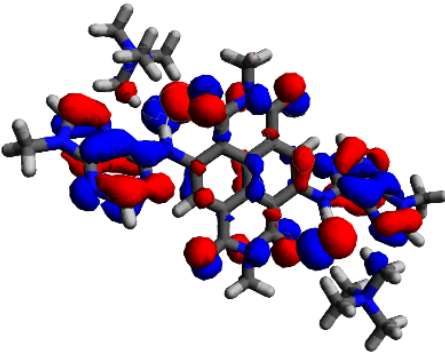 |
|-----|-----|----------|------------------------------------------------------------------------------------|

**Table S3:** Optimised structures of NDI-A, A-NDI-A, NDI-A+TBAF, and A-NDI-A+2TBAF and their Calculated TD-DFT excitation.

| Molecules                                                                           | Excitation Wavelength (nm) | Oscillator Strength (f) | Excitations | Percentage Contribution for transition |
|-------------------------------------------------------------------------------------|----------------------------|-------------------------|-------------|----------------------------------------|
| <b>NDI-A</b>                                                                        | 480.64                     | 0.2237                  | 114 ->115   | HOMO->LUMO (98%)                       |
| 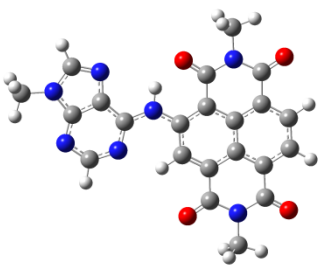 | 362.83                     | 0.2239                  | 113 ->115   | H-1->LUMO (95%)                        |
|                                                                                     | 291.73                     | 0.8109                  | 106 ->115   | H-8->LUMO (5%),                        |
|                                                                                     |                            |                         | 114 ->116   | HOMO->L+1 (5%)                         |
|                                                                                     |                            |                         | 114 ->117   | HOMO->L+2 (83%)                        |
| <b>A-NDI-A</b>                                                                      | 542.12                     | 0.3831                  | 152 ->153   | HOMO->LUMO (99%)                       |
|  | 362.78                     | 0.1629                  | 150 ->153   | H-2->LUMO (93%)                        |
|                                                                                     |                            |                         | 152 ->155   | HOMO->L+2 (5%)                         |
|                                                                                     | 320.21                     | 1.0740                  | 141 ->153   | H-11->LUMO (7%),                       |
|                                                                                     |                            |                         | 150 ->153   | H-2->LUMO (4%)                         |
|                                                                                     |                            |                         | 152 ->155   | HOMO->L+2 (87%)                        |
| <b>NDI-A+TBAF</b>                                                                   | 525.43                     | 0.1489                  | 140 ->141   | HOMO->LUMO (98%)                       |
|  | 369.80                     | 0.1782                  | 133 ->141   | H-7->LUMO (2%),                        |
|                                                                                     |                            |                         | 137 ->141   | H-3->LUMO (20%),                       |
|                                                                                     |                            |                         | 138 ->141   | H-2->LUMO (2%)                         |
|                                                                                     |                            |                         | 139 ->141   | H-1->LUMO (70%)                        |
|                                                                                     | 304.39                     | 0.2255                  | 127 ->141   | H-13->LUMO (36%),                      |
|                                                                                     |                            |                         | 129 ->141   | H-11->LUMO (4%),                       |
|                                                                                     |                            |                         | 130 ->141   | H-10->LUMO (2%),                       |

|                                                                                   |                      |        |           |                 |                  |
|-----------------------------------------------------------------------------------|----------------------|--------|-----------|-----------------|------------------|
| 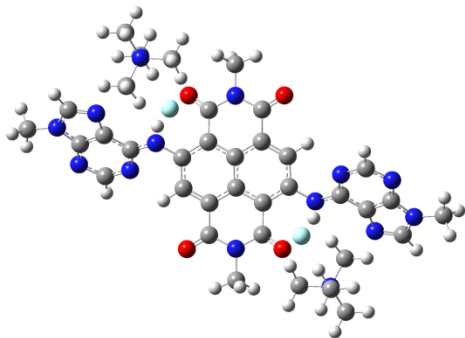 |                      |        | 132 ->141 | H-8->LUMO (3%), |                  |
|                                                                                   |                      |        | 140 ->142 | HOMO->L+1 (3%)  |                  |
|                                                                                   |                      |        | 140 ->143 | HOMO->L+2 (41%) |                  |
|                                                                                   | <b>A-NDI-A+2TBAF</b> | 537.74 | 0.3300    | 204 ->205       | HOMO->LUMO (98%) |
|                                                                                   |                      | 370.41 | 0.1945    | 202 ->205       | H-2->LUMO (89%)  |
|                                                                                   |                      |        | 204 ->207 | HOMO->L+2 (3%)  |                  |
|                                                                                   | 321.25               | 1.0019 | 195 ->205 | H-9->LUMO (4%), |                  |
|                                                                                   |                      |        | 202 ->205 | H-2->LUMO (3%)  |                  |
|                                                                                   |                      |        | 204 ->207 | HOMO->L+2 (85%) |                  |

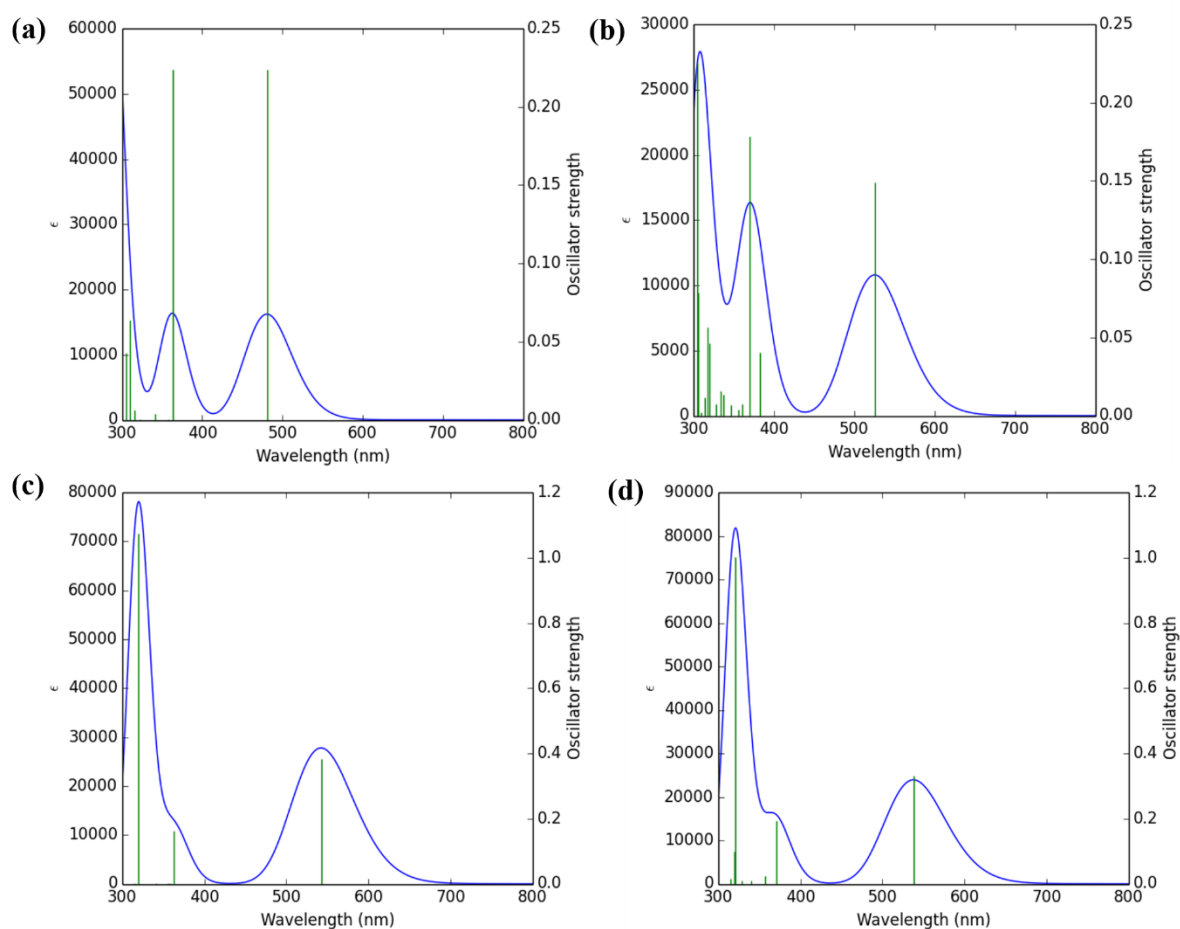

**Fig. S21** The computed absorption spectra of (a) NDI-A; (b) NDI-A+TBAF; (c) A-NDI-A and (d) A-NDI-A+2TBAF

| Experimental      |                                      | DFT calculation                       |                           |                           |                                  |                                       |                                |                                |              |              |               |
|-------------------|--------------------------------------|---------------------------------------|---------------------------|---------------------------|----------------------------------|---------------------------------------|--------------------------------|--------------------------------|--------------|--------------|---------------|
| Compound          | $E_{onset}^{ox}$<br>(V)<br>$\pm 0.1$ | $E_{onset}^{red}$<br>(V)<br>$\pm 0.1$ | HOMO<br>(eV)<br>$\pm 0.1$ | LUMO<br>(eV)<br>$\pm 0.1$ | $E_{g(cv)}$<br>(eV)<br>$\pm 0.2$ | $E_g$<br>Optical<br>(eV)<br>$\pm 0.2$ | $-\Delta G_{ET(CR)}^o$<br>(eV) | $-\Delta G_{ET(CS)}^o$<br>(eV) | HOMO<br>(eV) | LUMO<br>(eV) | $E_g$<br>(eV) |
| NDI-A             | 1.60                                 | -0.69                                 | -6.30                     | -4.01                     | 2.29                             | 2.33                                  | 2.45                           | 0.54                           | -6.051       | -3.139       | 2.9           |
| A-NDI-A           | 1.29                                 | -0.76                                 | -5.99                     | -3.94                     | 2.05                             | 2.11                                  | 2.48                           | 0.48                           | -5.546       | -2.973       | 2.5           |
| NDI-A<br>+TBAF    | 0.90                                 | -0.40                                 | -5.30                     | -3.99                     | 1.31                             | 2.33                                  | 2.42                           | 0.21                           | -5.256       | -2.483       | 2.77          |
| A-NDI-A<br>+ TBAF | 0.81                                 | -0.72                                 | -5.21                     | -3.67                     | 1.54                             | 2.10                                  | 1.95                           | 0.17                           | -4.533       | -1.837       | 2.70          |

|  | ESA, nm (eV) | Life time ( $\tau$ ) | GSB, nm (eV) | Life time ( $\tau$ ) |
|--|--------------|----------------------|--------------|----------------------|
|  |              |                      |              |                      |

**Table S4.** Cyclic voltammetry experimental and DFT calculations for energy gap determination.

**Table S5.** Summary of the various parameters derived from the  $1 \times 10^{-5}$  M solutions of **NDI-A** and **A-NDI-A** in DCM and their mixture with 50 equivalents TBAF transient absorption (TA) spectra and global fitting for lifetime estimation. Transitions are shown as superscript numeral in correlation with Figure 7.

|              |                                                    |                                                           |                                                    |                                        |
|--------------|----------------------------------------------------|-----------------------------------------------------------|----------------------------------------------------|----------------------------------------|
| NDI-A        | 528 (2.34) <sup>1</sup><br>760 (1.63) <sup>3</sup> | $\tau_1 = 85$ ps<br>$\tau_1 = 26$ fs<br>$\tau_2 = 68$ ps  | 616 (2.01) <sup>2</sup>                            | $\tau_1 = 110$ ps                      |
| NDI-A+TBAF   | 545 (2.24) <sup>1</sup>                            | $\tau_1 = 31$ ps<br>$\tau_2 = 118$ fs                     | 605 (2.04) <sup>2</sup><br>761 (1.62) <sup>4</sup> | $\tau_1 = 271$ fs<br>$\tau_1 = 350$ fs |
| A-NDI-A      | 615 (2.01) <sup>1</sup><br>733 (1.69) <sup>3</sup> | $\tau_1 = 477$ fs<br>$\tau_1 = 20$ ps<br>$\tau_2 = 31$ ps | 550 (2.25) <sup>2</sup>                            | $\tau_1 = 85$ fs                       |
| A-NDI-A+TBAF |                                                    |                                                           | 555 (2.23) <sup>2</sup><br>735 (2.23) <sup>4</sup> | $\tau_1 = 196$ fs<br>$\tau_1 = 130$ fs |
| SVB-M1       | 526<br>762                                         | $\tau_1 = 300$ fs<br>$\tau_2 = 11$ ps<br>$\tau_1 = 10$ ps | 597                                                | $\tau_1 = 186$ fs<br>$\tau_2 = 345$ fs |

ESA=Excited state emission; GSB=Ground state bleaching

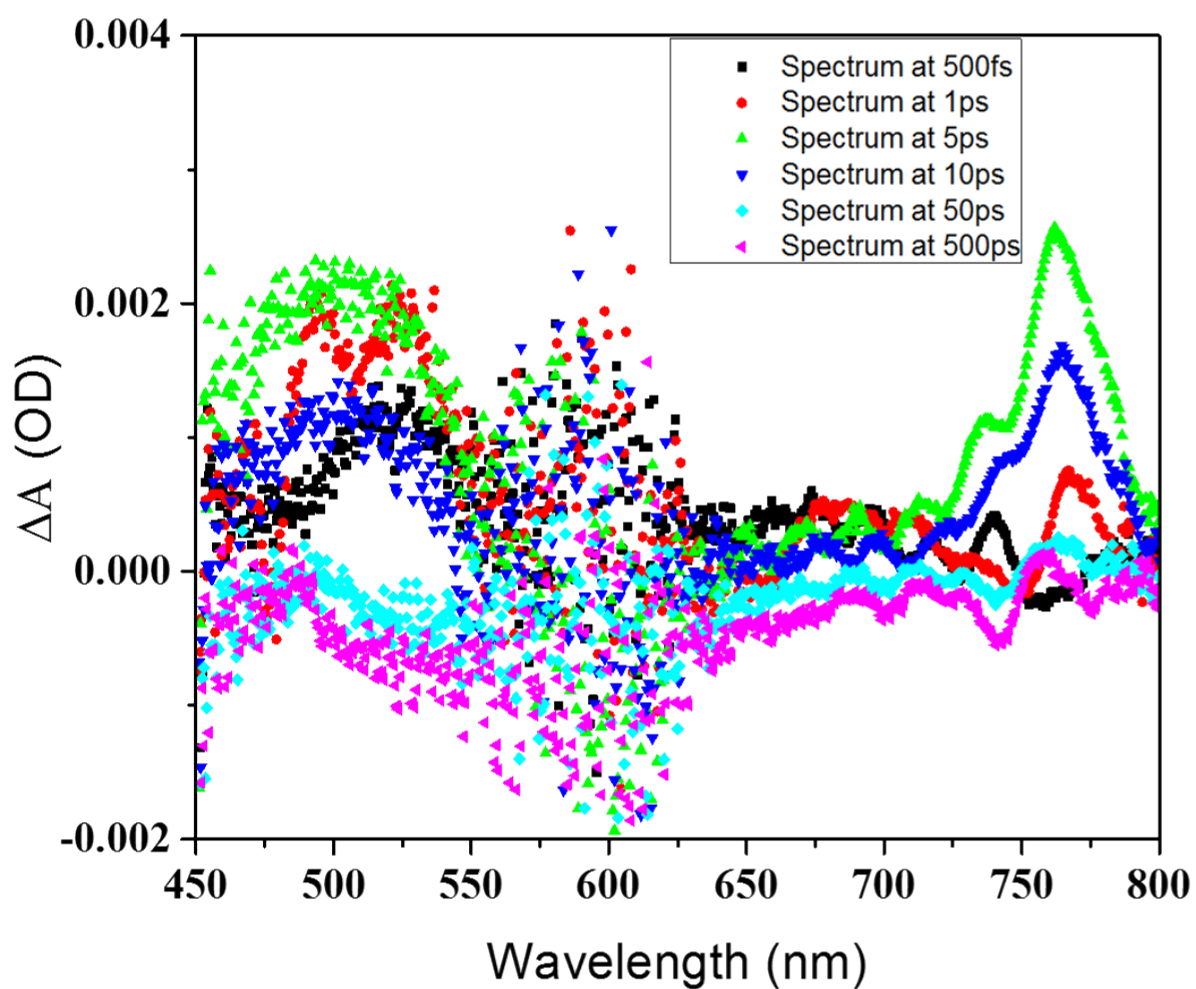

**Fig S22** TAS study of **SVB-M1** in visible region

**Notes and References**

- 1 A. Robitaille, S. A. Jenekhe and M. Leclerc, *Chem. Mater.*, 2018, **30**, 5353–5361.
- 2 (a) H. Vollmann, H. Becker, M. Corell and H. Streeck, *Justus Liebigs Ann. Chem.*, 1937, **531**, 1-159; (b) F. Würthner, S. Ahmed, C. Thalacker and T. Debaerdemaeker, *Chem.–Eur. J.*, 2002, **8**, 4742-4750; (c) S. V. Bhosale, M. B. Kalyankar, S. V. Bhosale, S. J. Langford, E. F. Reid and C. Hogan, *New J. Chem.*, 2009, **33**, 2409-2413.
- 3 D. Egloff, I. A. Oleinich, and E. Freisinger, *ACS Chem. Biol.*, 2015, **10**, 547–55
